# Supplementary material for: In–Bi bimetallic nanofibers with controllable crystal facets for high-rate electrochemical reduction of CO2 to formate
Source: Royal Society of Chemistry journal article supplement (doi:10.1039/d3ta01481a), 2023-01-01
Supplement: d3ta01481a1.pdf [file d3ta01481a1.pdf]

## Supporting Information

*Yumeng Li<sup>a</sup>, Yingmin Jin<sup>a,\*</sup>, Xin Zong<sup>a</sup>, Xuebai Zhang<sup>a</sup>, Guanshu Li<sup>b</sup>, Yueping Xiong<sup>a,\*</sup>*

<sup>a</sup> MIIT Key Laboratory of Critical Materials Technology for New Energy Conversion and Storage, School of Chemistry and chemical engineering, Harbin Institute of Technology, Harbin, 150001, P.R. China

<sup>b</sup> Key Laboratory of Science and Technology on Material Performance Evaluating in Space Environment, School of Materials Science and Engineering, Harbin Institute of Technology, Harbin, 150001, P.R. China

\*E-mail address: [jymjinyingmin@163.com](mailto:jymjinyingmin@163.com) (Y. Jin) [ypxiong@hit.edu.cn](mailto:ypxiong@hit.edu.cn) (Y. Xiong)

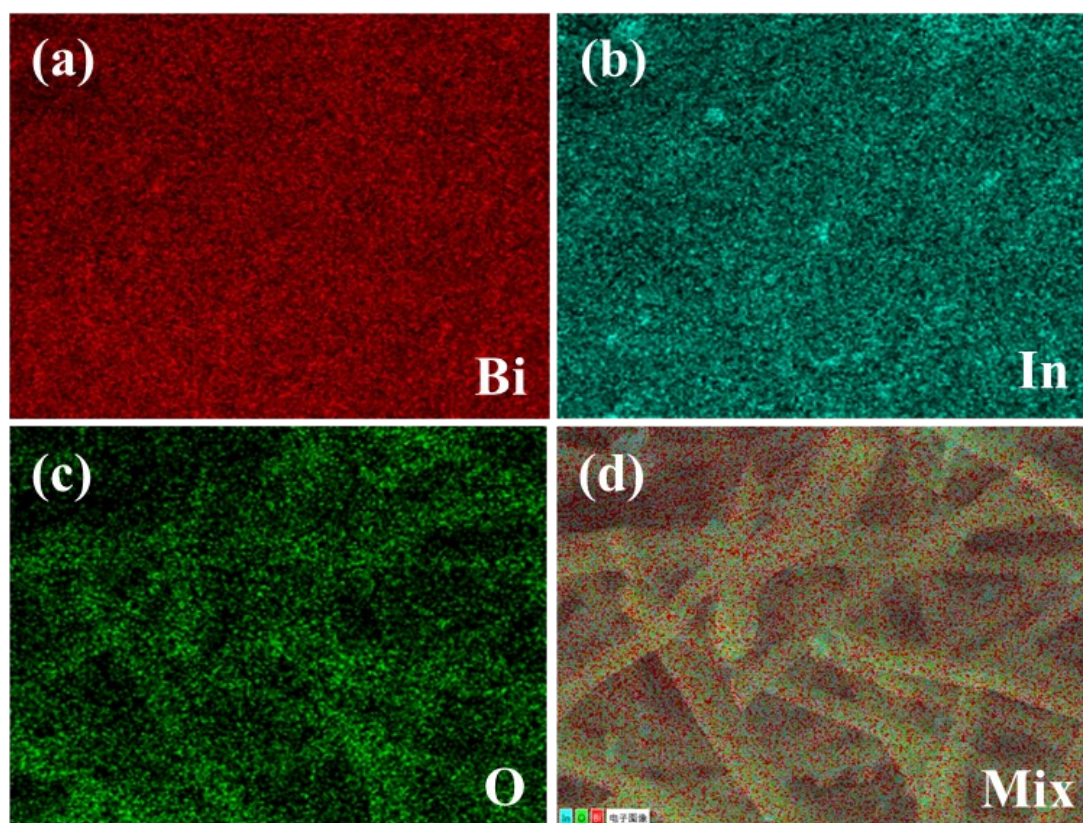

**Fig. S1.** the corresponding EDS mappings of (a) Bi, (b) In, (C) O, and (d) Mix for  $\text{Bi}_5\text{In}_5$  oxide precursor NFs.

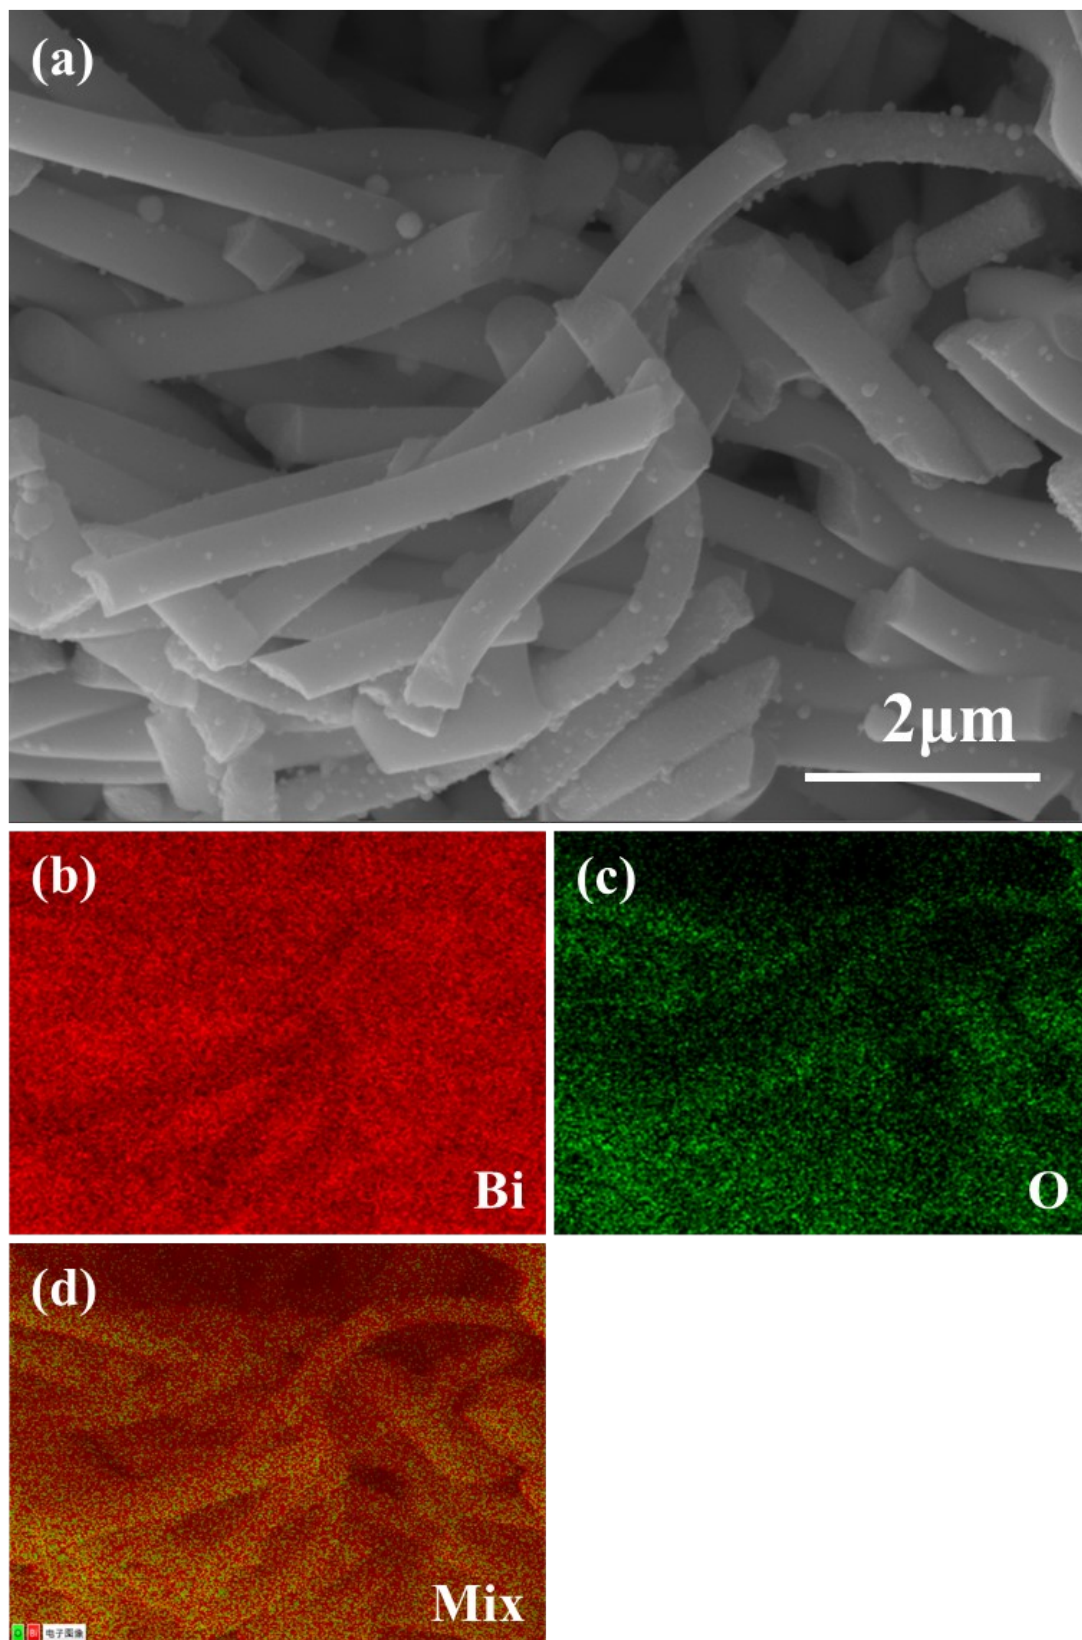

**Fig. S2.** (a) SEM image and (b, c, and d) the corresponding EDS mappings of the Bi oxide precursor NFs.

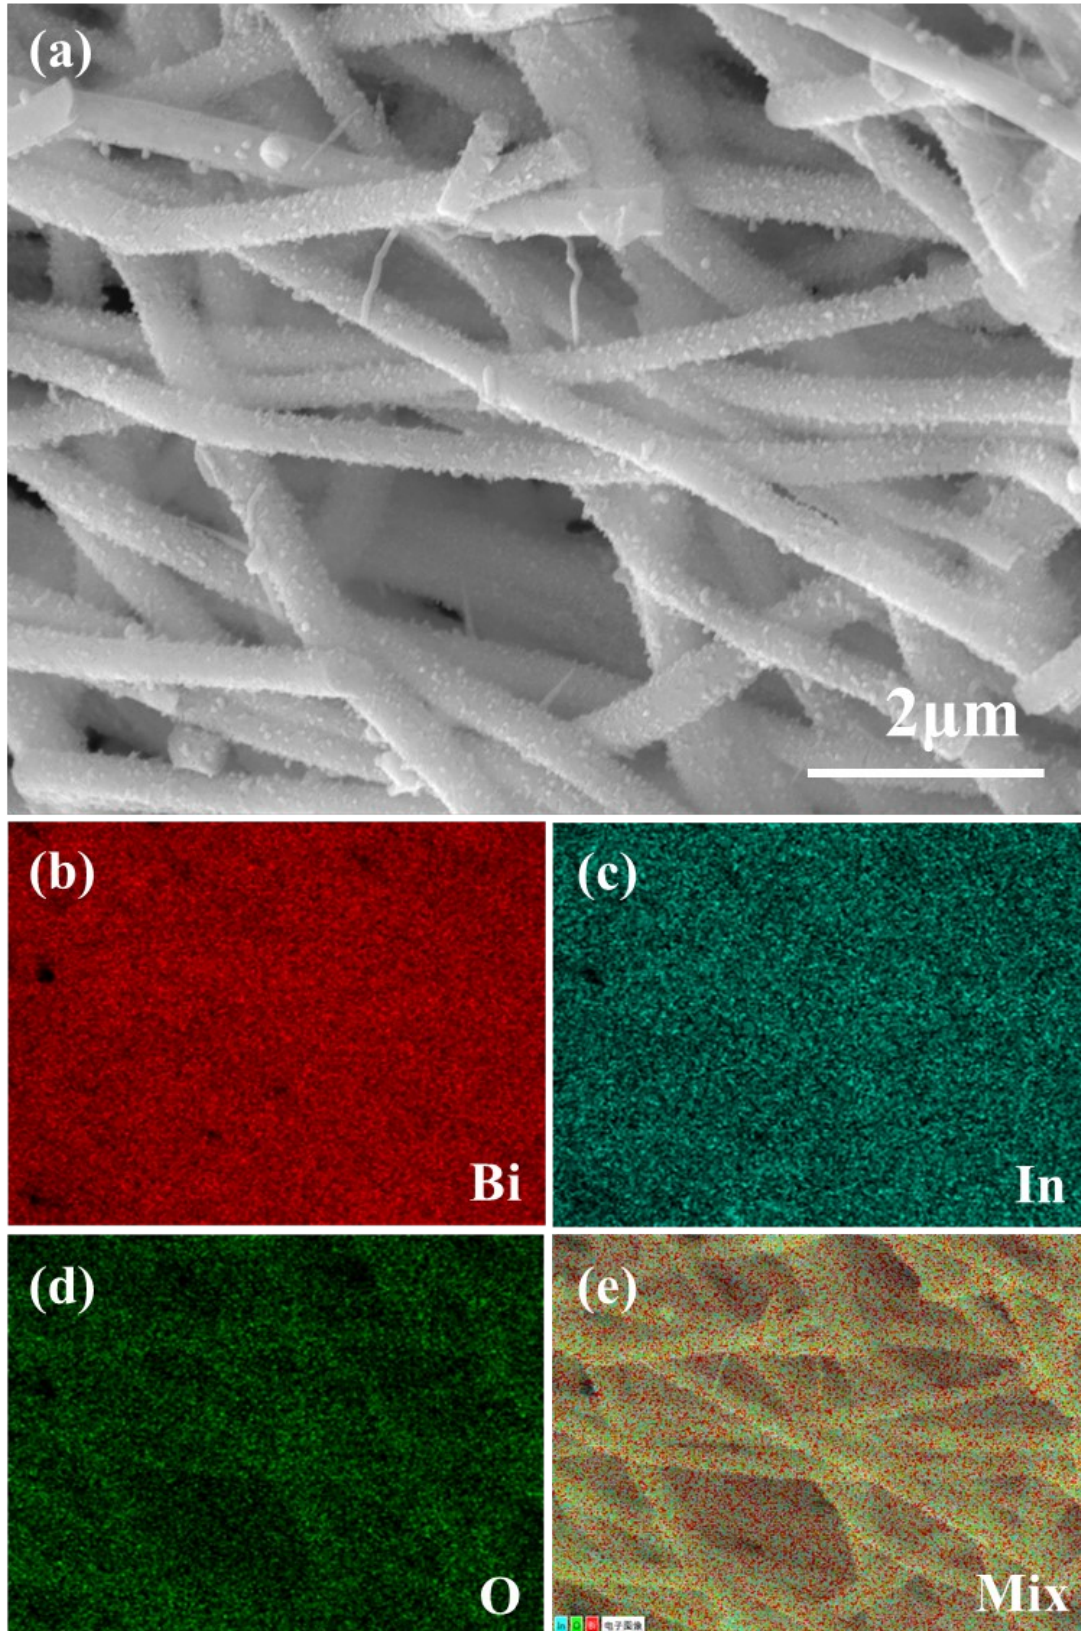

**Fig. S3.** (a) SEM image and (b, c, d and e) the corresponding EDS mappings of the  $\text{Bi}_7\text{In}_3$  oxide precursor NFs.

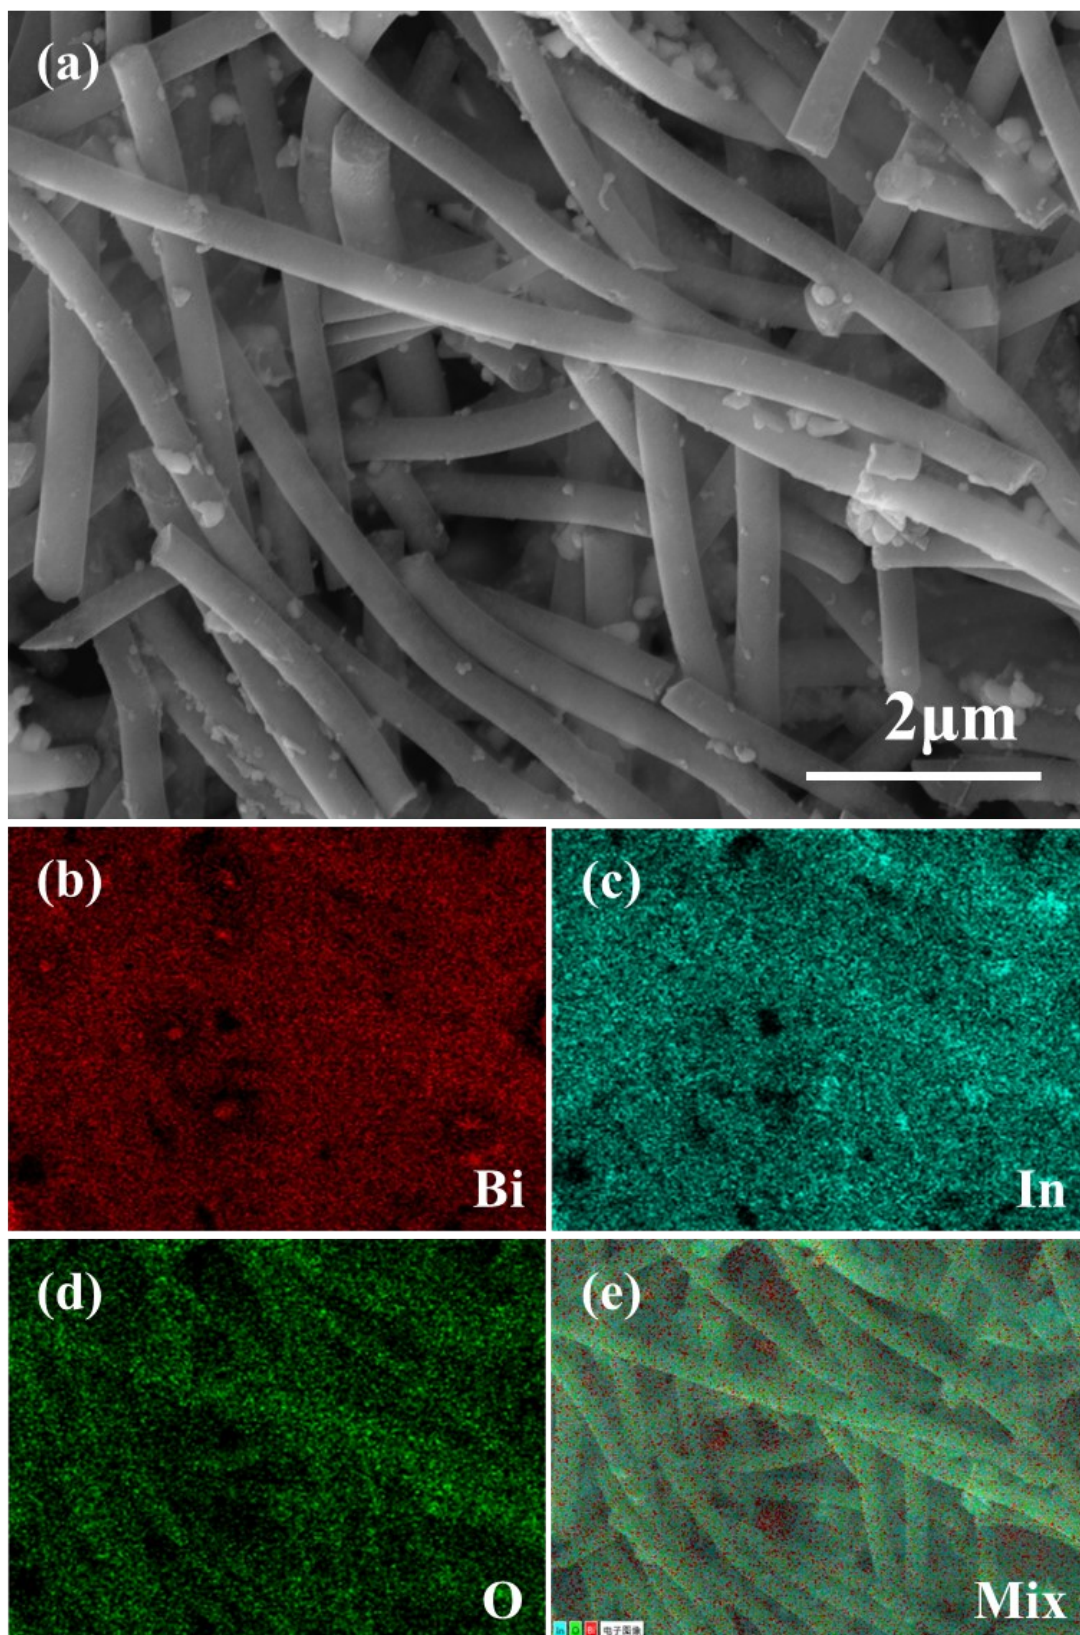

**Fig. S4.** (a) SEM image and (b, c, d and e) the corresponding EDS mappings of the  $\text{Bi}_3\text{In}_7$  oxide precursor NFs.

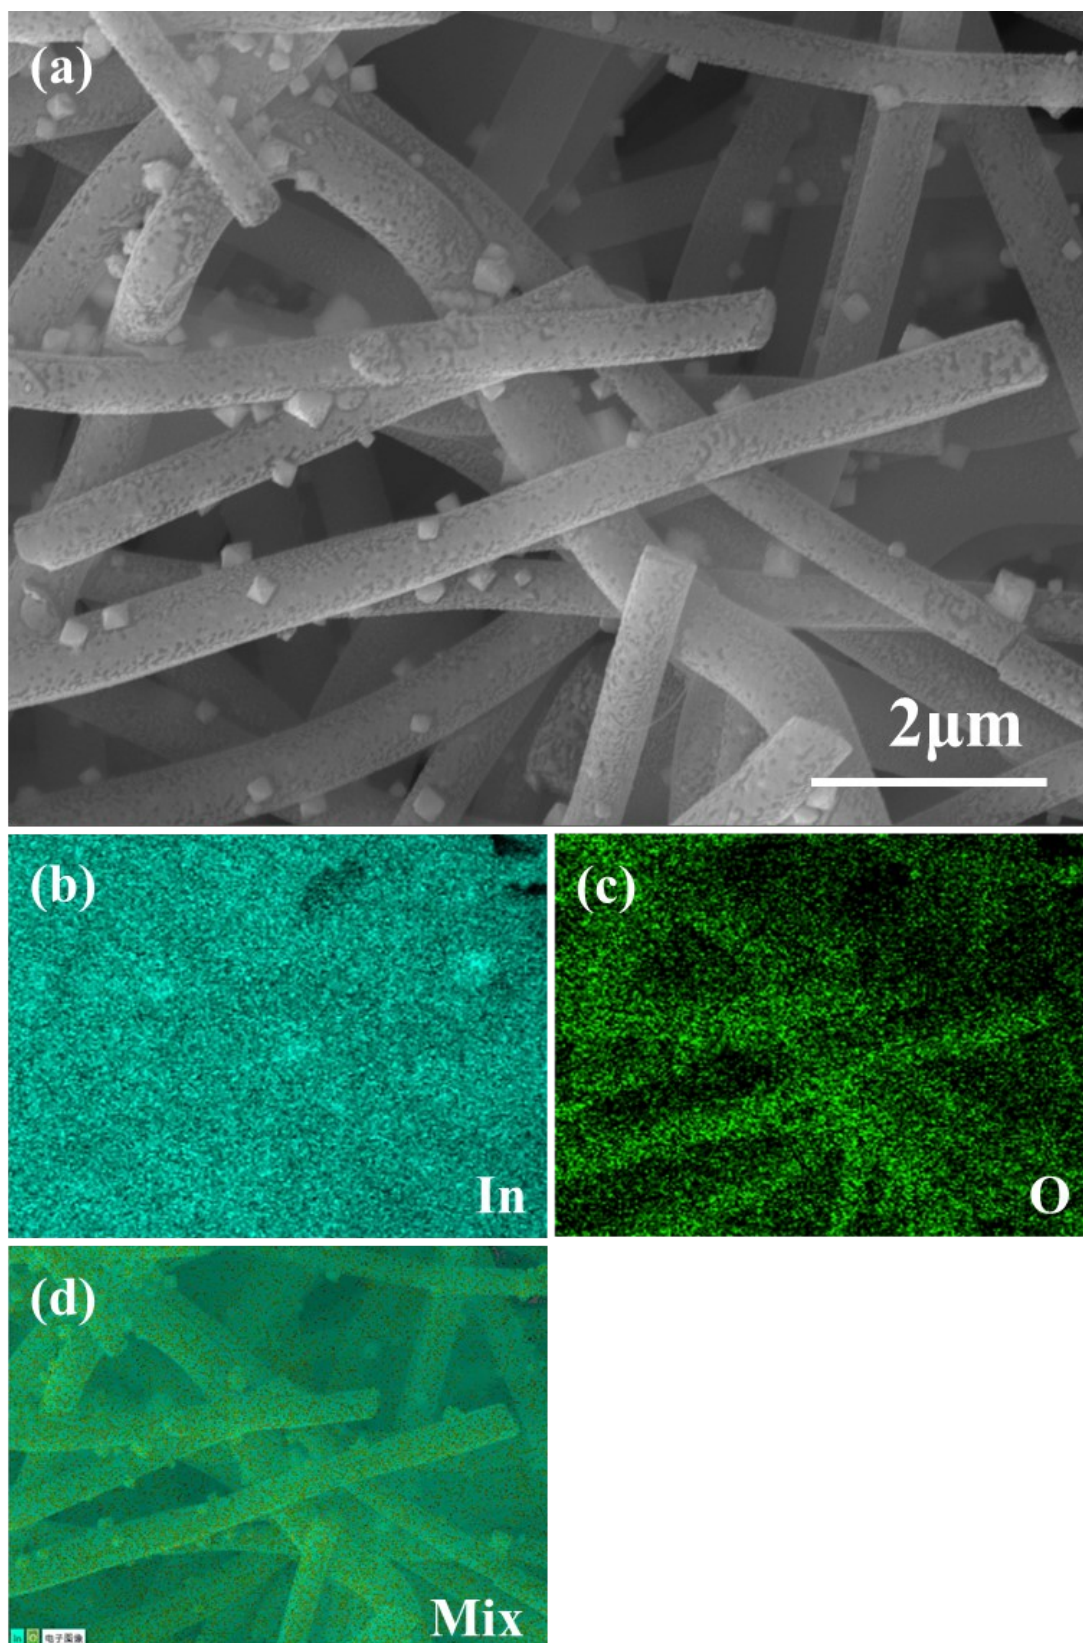

**Fig. S5.** (a) SEM image and (b, c, and d) the corresponding EDS mappings of the In oxide precursor NFs.

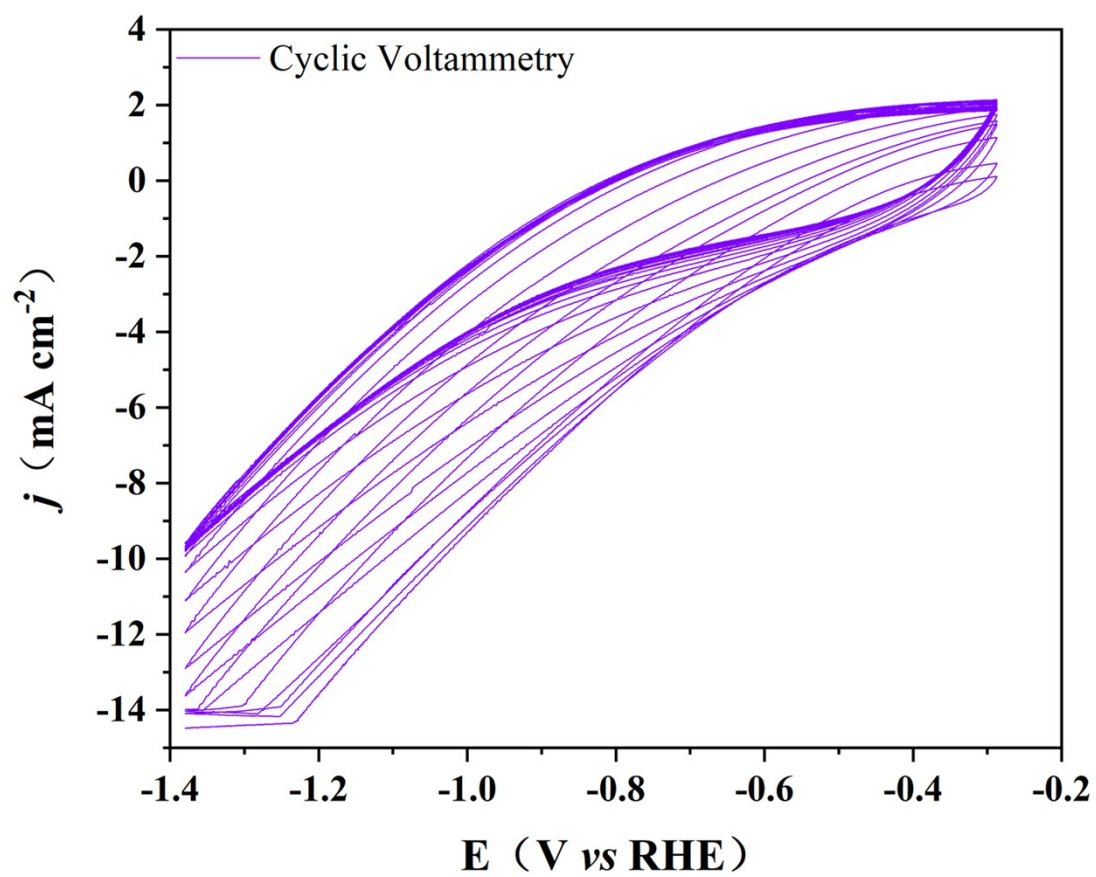

Fig. S6. the electrochemical reducing current-voltage curve.

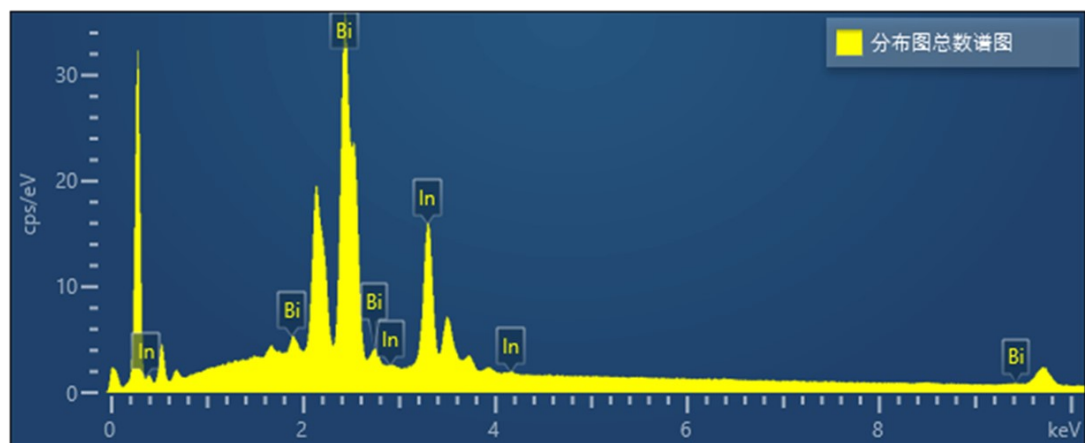

**Fig. S7.** EDS of Bi<sub>5</sub>In<sub>5</sub> NFs.

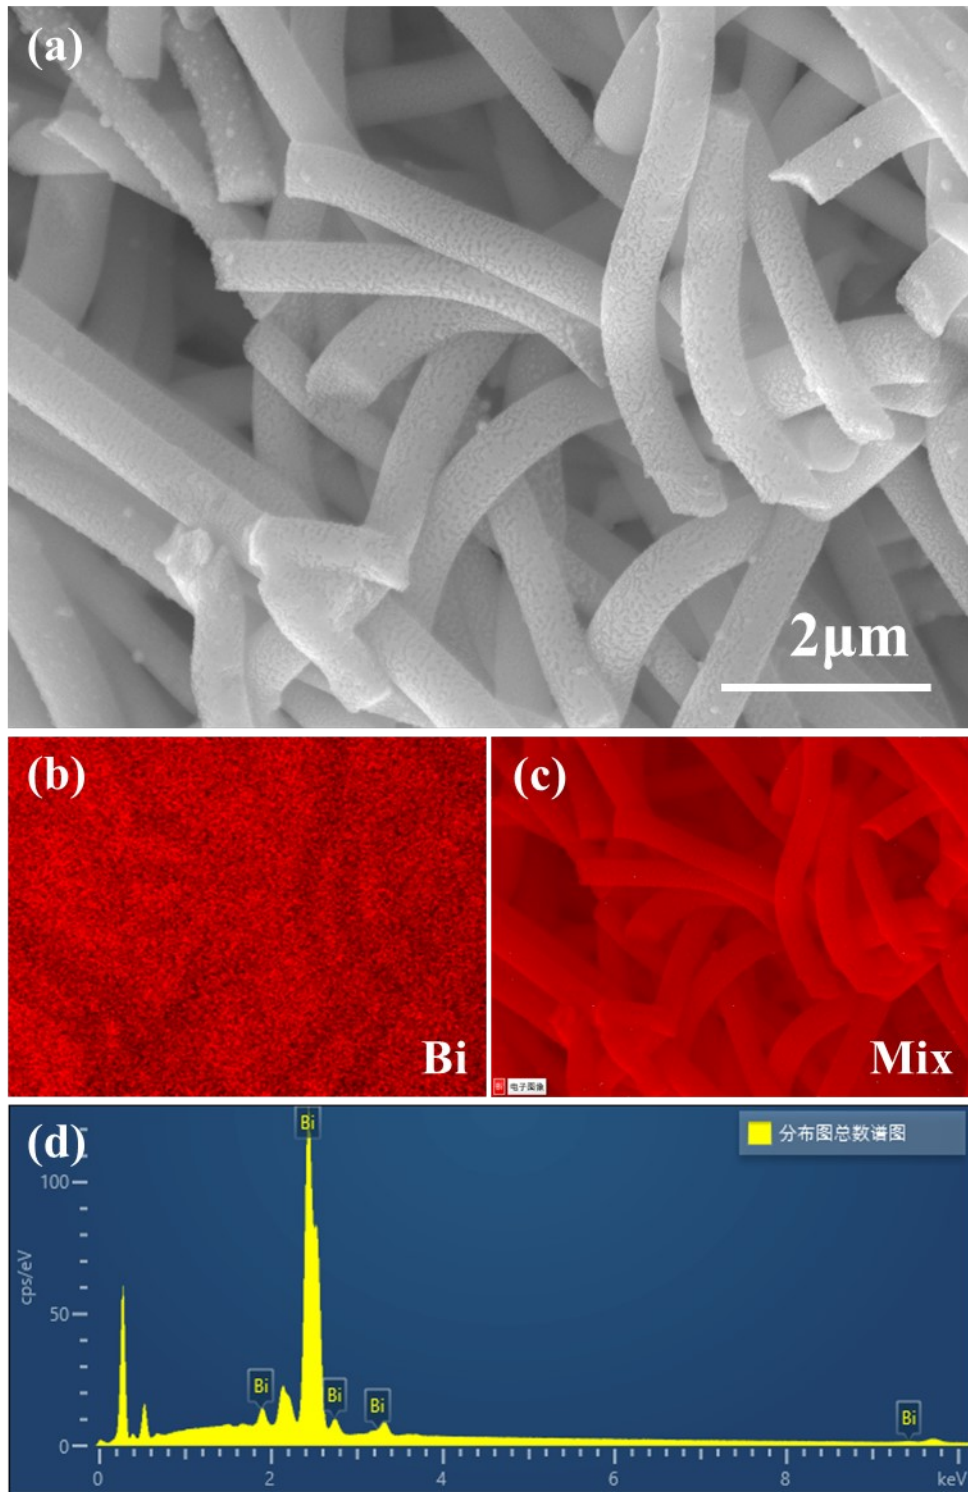

**Fig. S8.** (a) SEM image and (b, c, and d) the corresponding EDS and mappings of the Bi NFs.



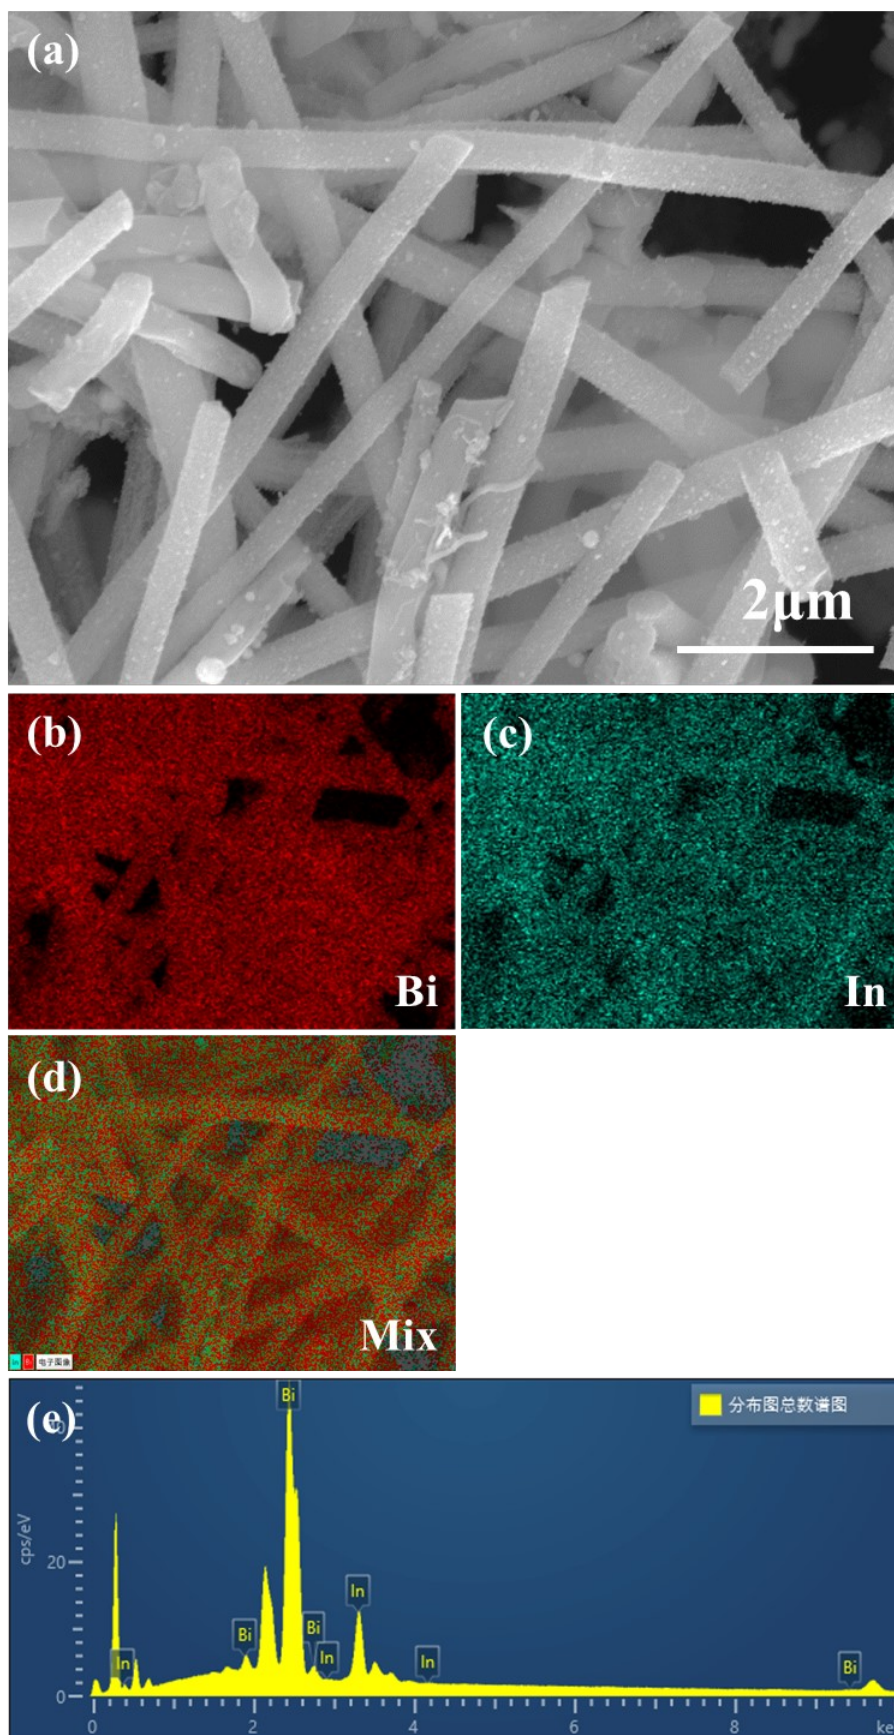

**Fig. S9.** (a) SEM image and (b, c, d and e) the corresponding EDS and mappings of the  $\text{Bi}_7\text{In}_3$  NFs.

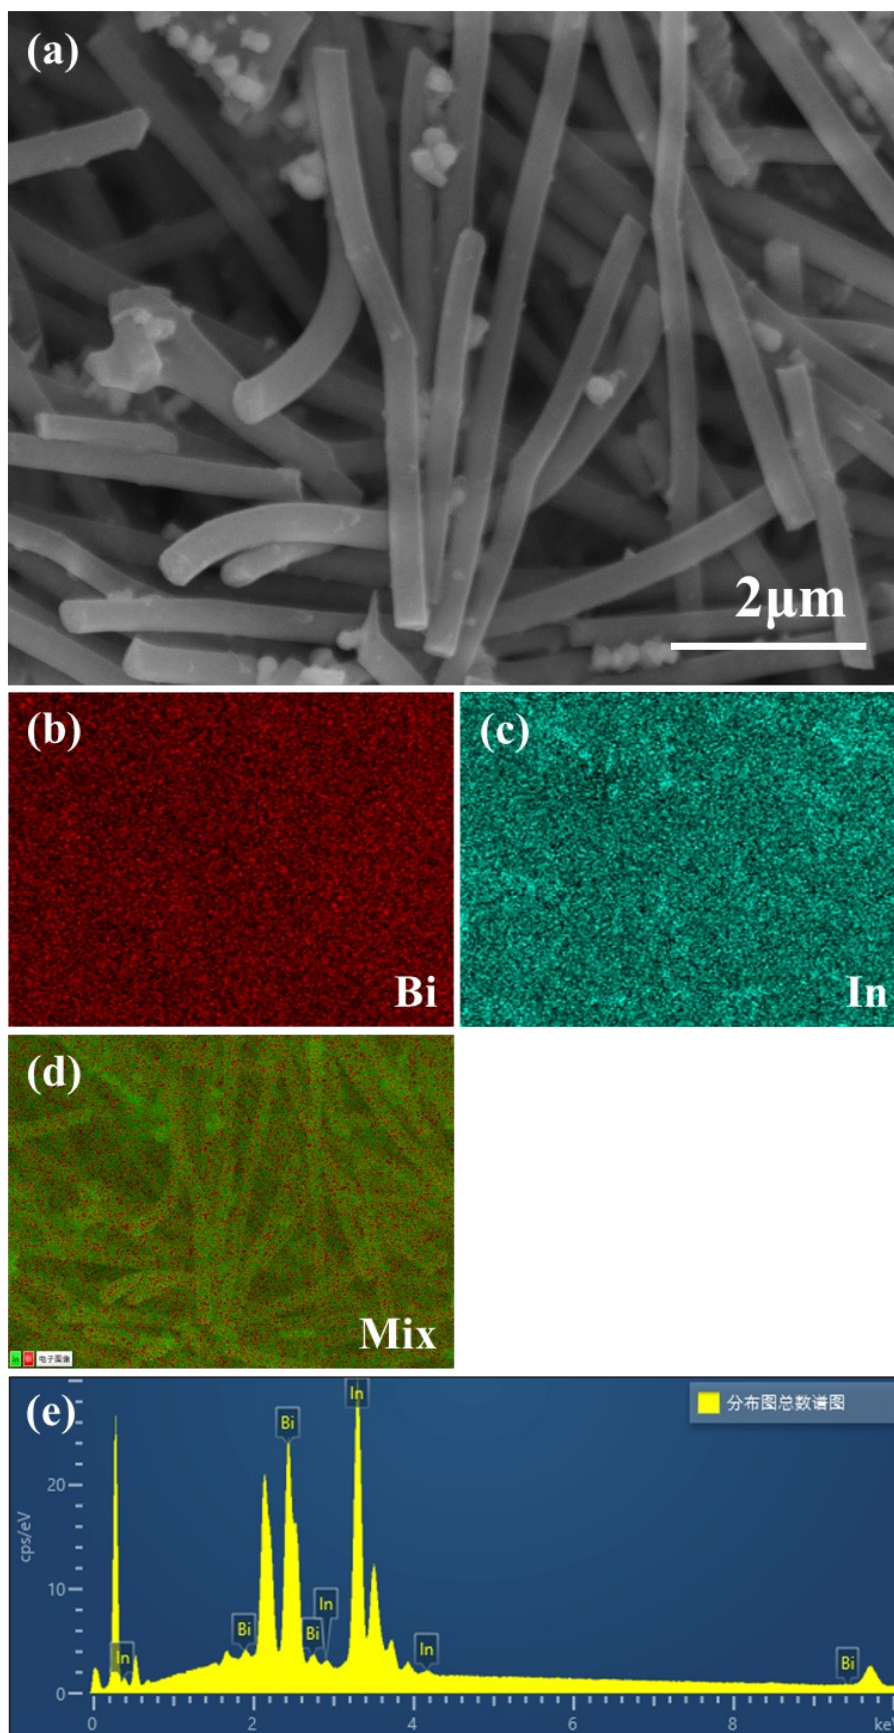

**Fig. S10.** (a) SEM image and (b, c, d and e) the corresponding EDS and mappings of the  $\text{Bi}_3\text{In}_7$  NFs.

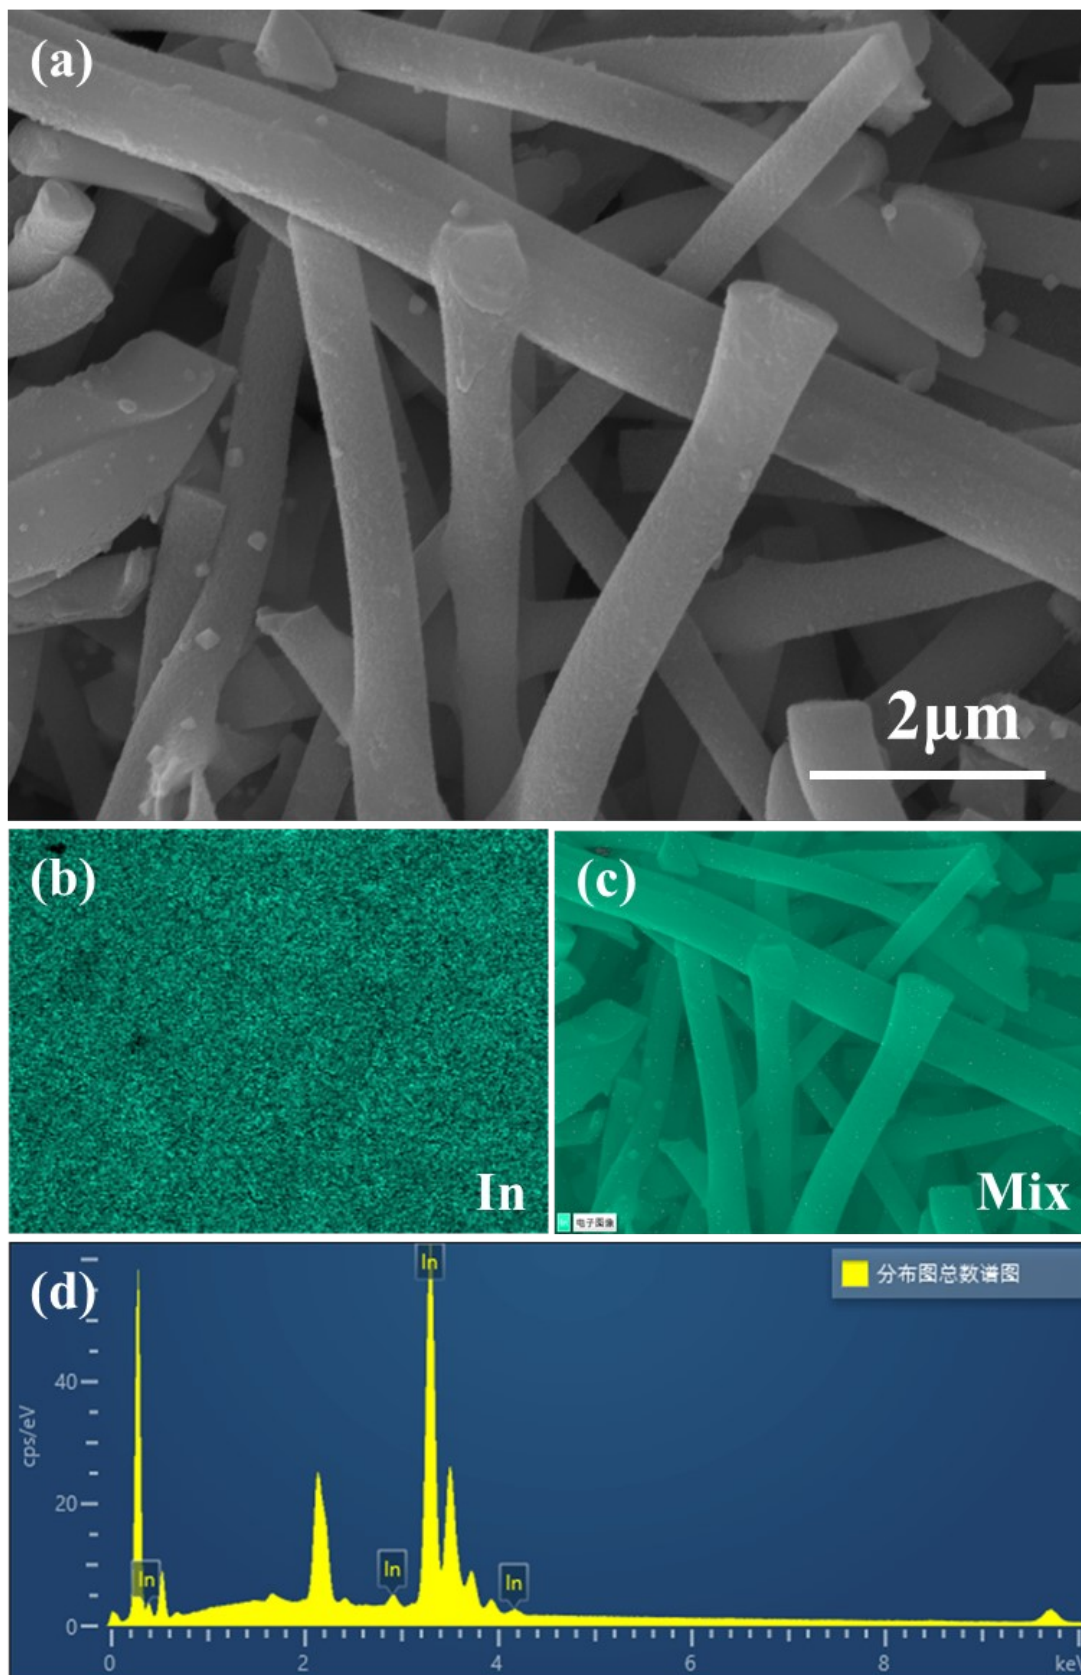

**Fig. S11.** (a) SEM image and (b, c, d and e) the corresponding EDS and mappings of the Bi<sub>3</sub>In<sub>7</sub> NFs.

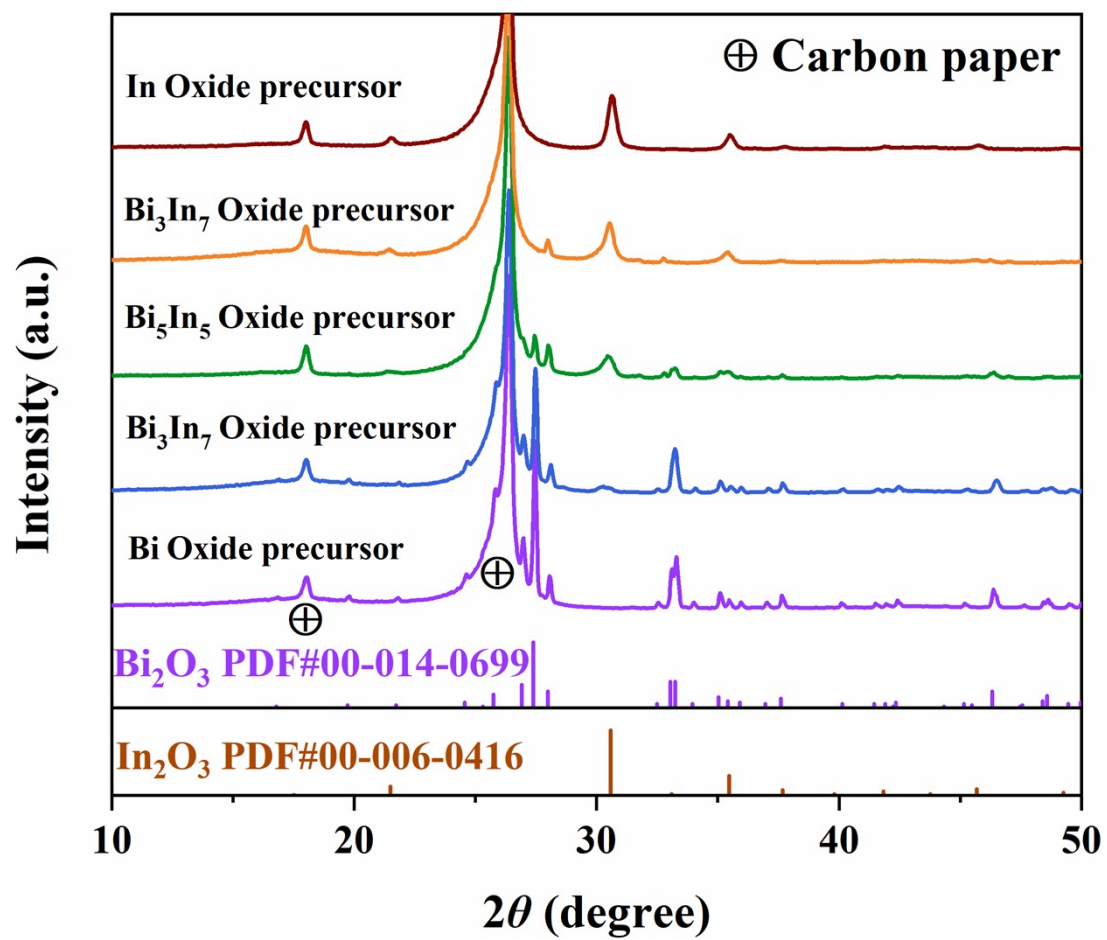

Fig. S12. XRD patterns of the oxide precursor NFs.

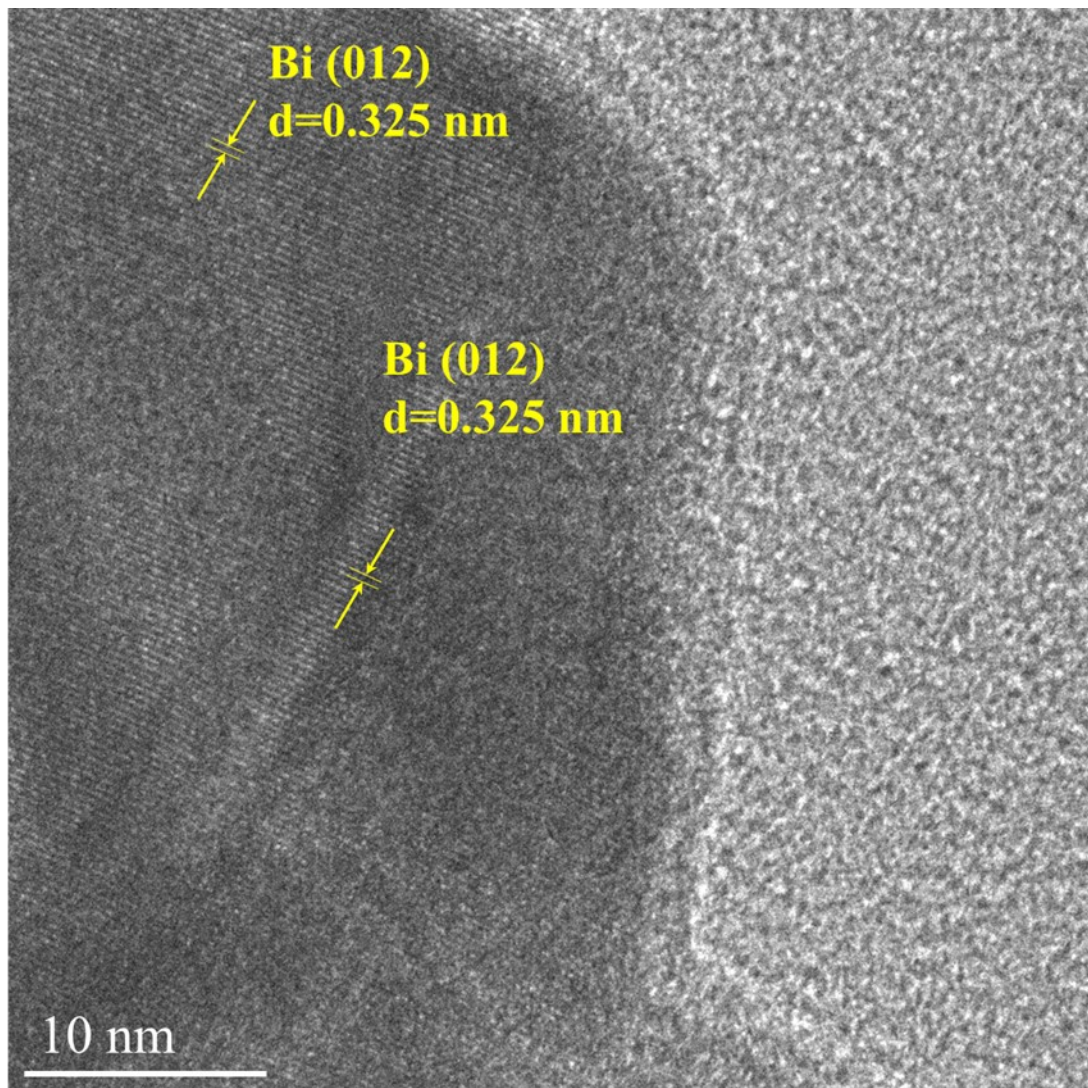

**Fig. S13.** HRTEM of Bi.

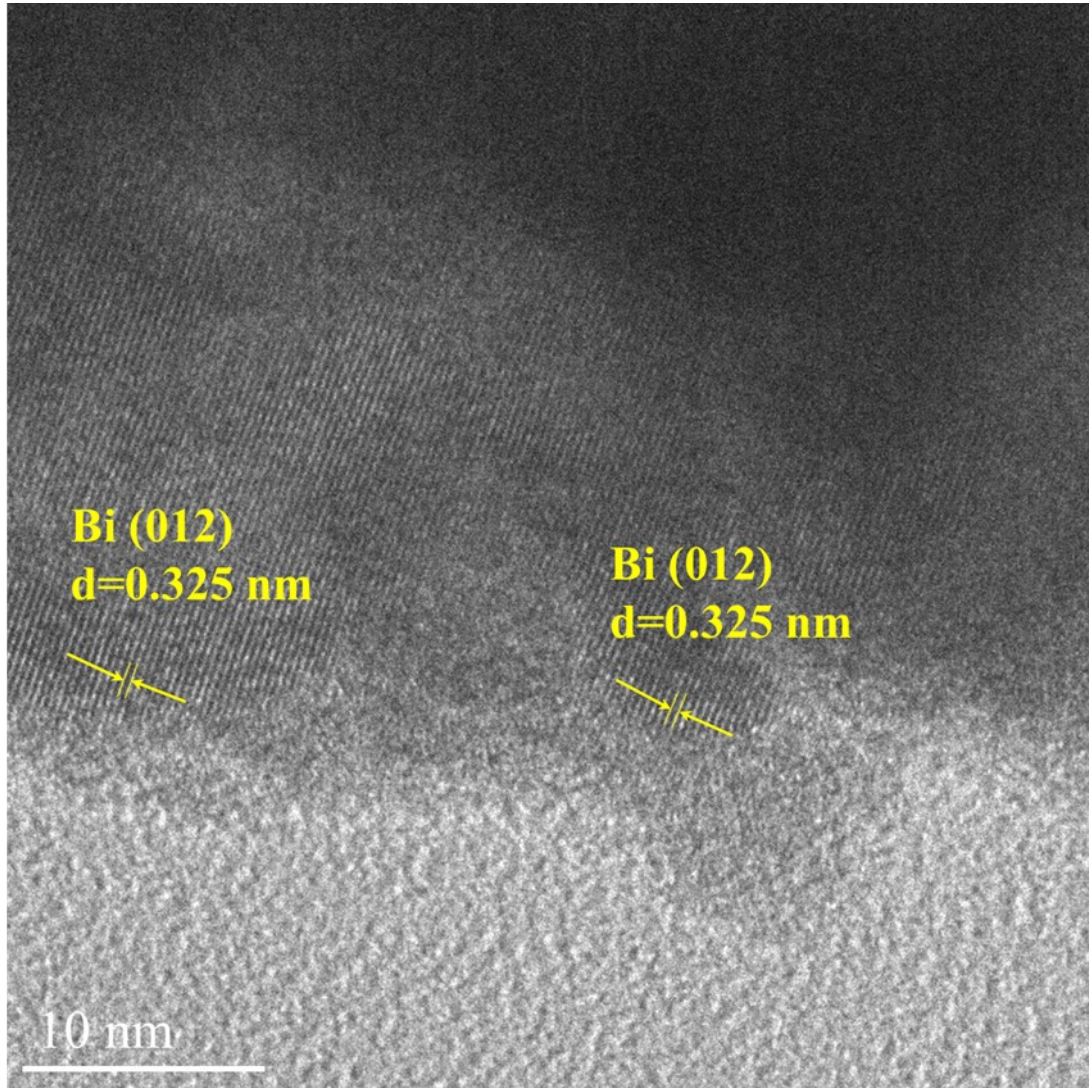

**Fig. S14.** HRTEM of  $\text{Bi}_7\text{In}_3$ .

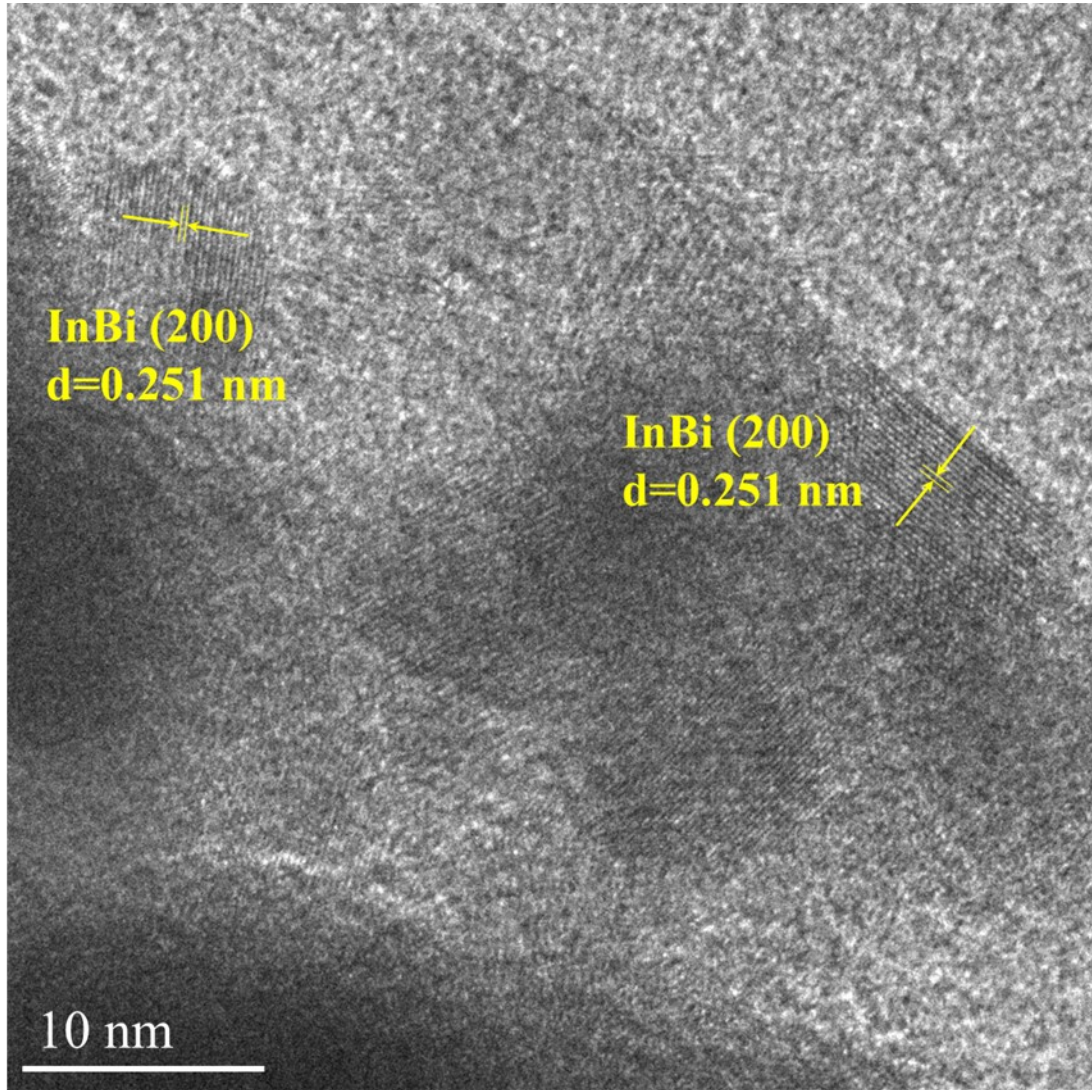

**Fig. S15.** HRTEM of  $\text{Bi}_5\text{In}_5$ .

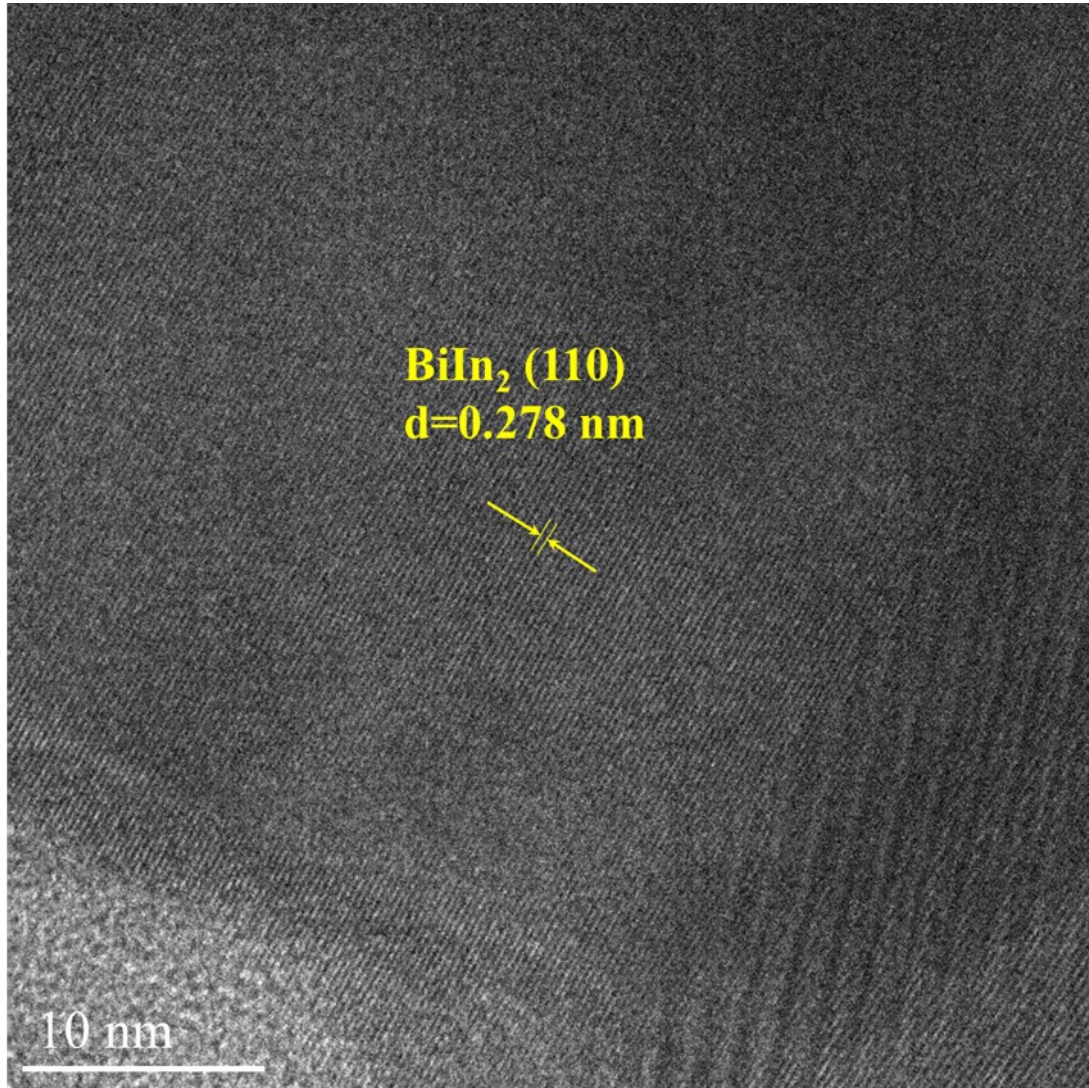

**Fig. S16.** HRTEM of Bi<sub>3</sub>In<sub>7</sub>.



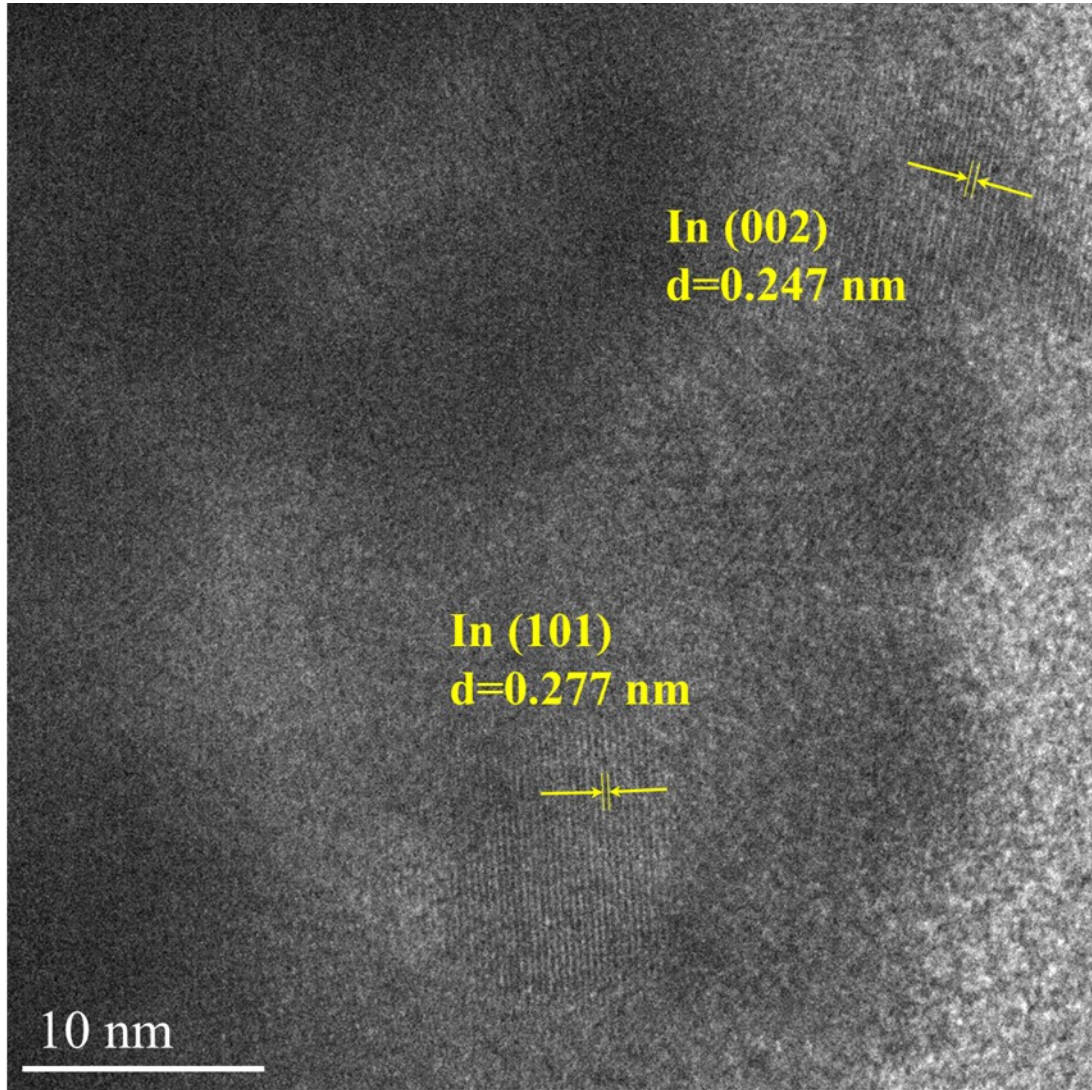

**Fig. S17.** HRTEM of In.

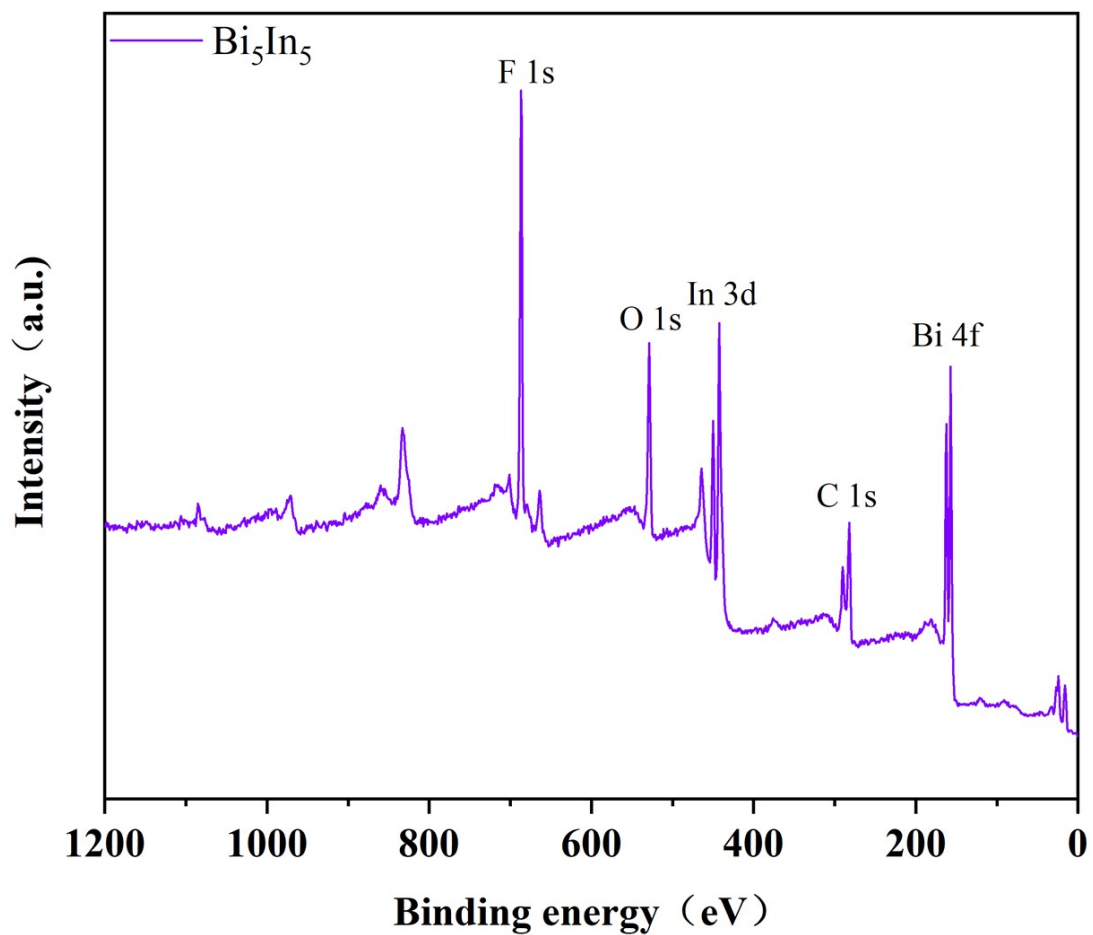

**Fig. S18.** full range XPS spectrum of the  $\text{Bi}_5\text{In}_5$  NFs.

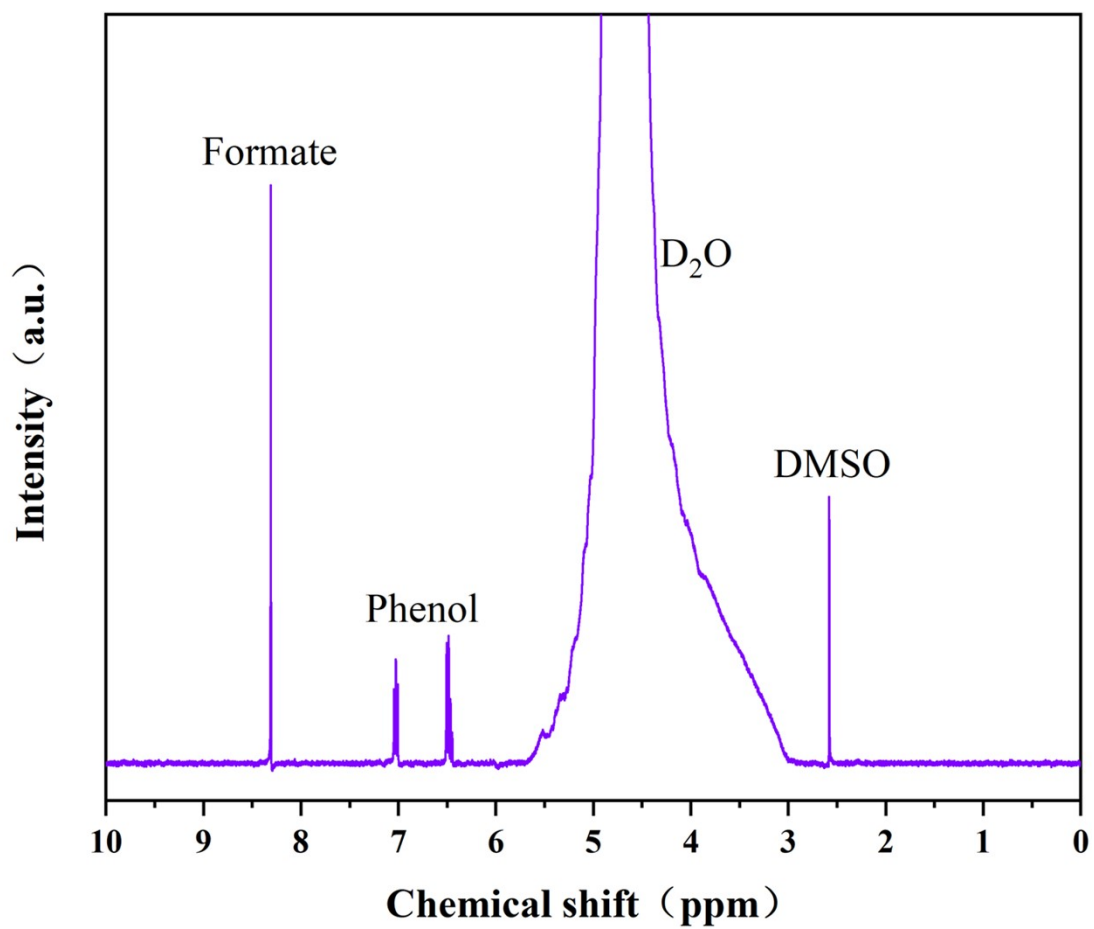

**Fig. S19.**  $^1\text{H}$  NMR spectra of the  $\text{Bi}_5\text{In}_5$  NFs.

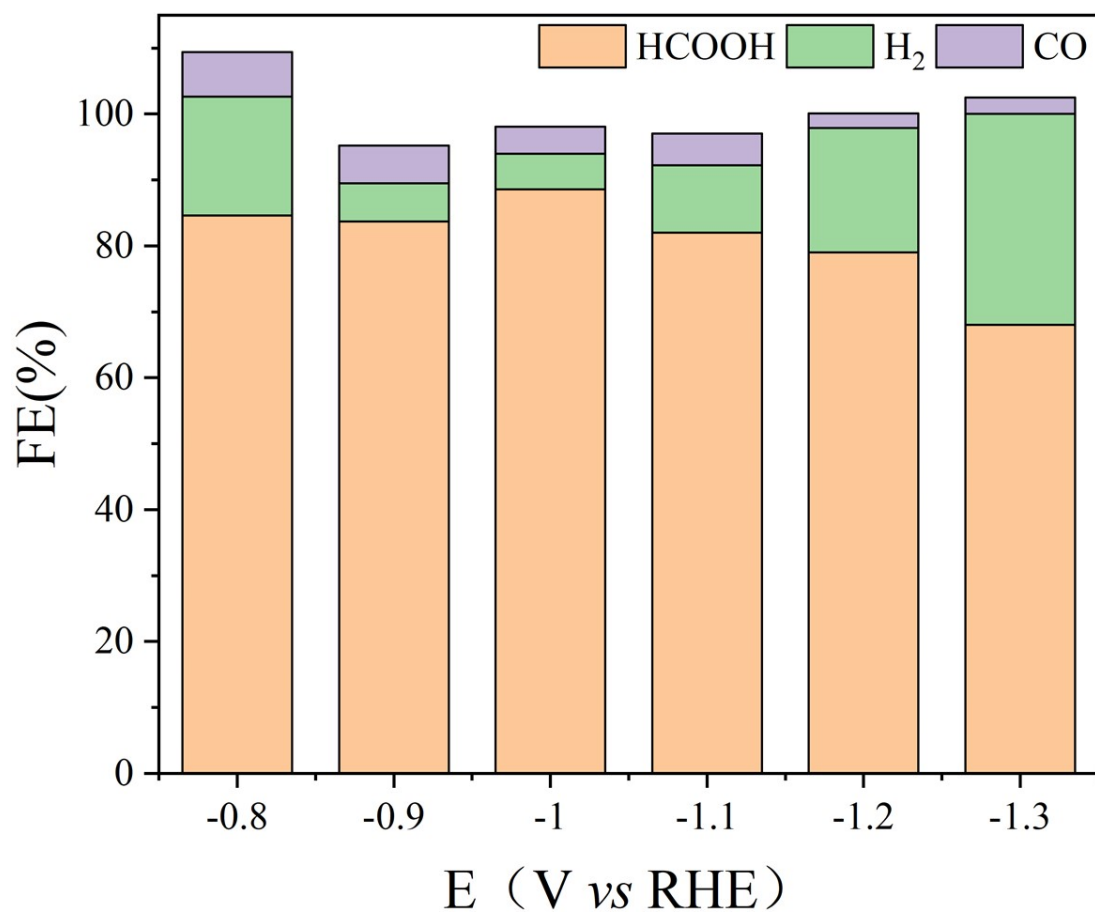

**Fig. S20.** FE for HCOOH, H<sub>2</sub>, CO at different potentials on Bi NF.

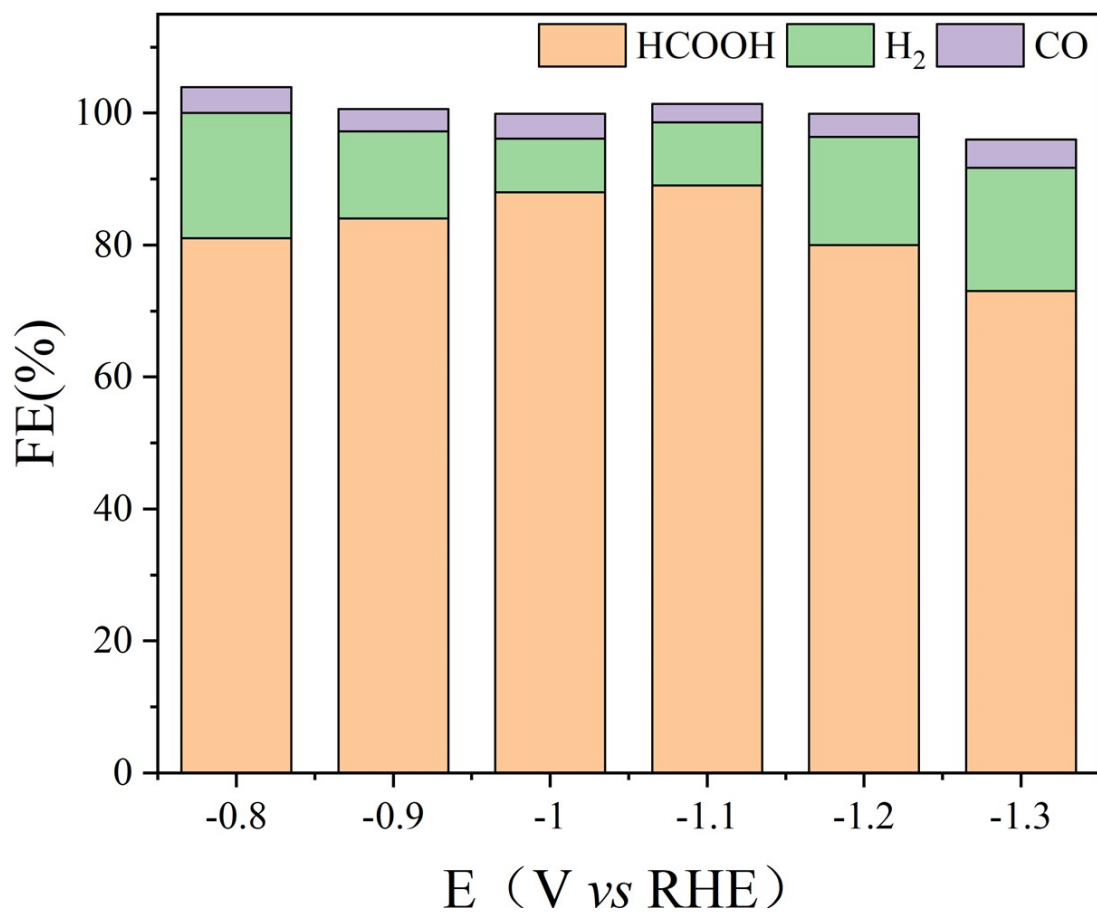

**Fig. S21.** FE for HCOOH, H<sub>2</sub>, CO at different potentials on Bi<sub>7</sub>In<sub>3</sub> NF.

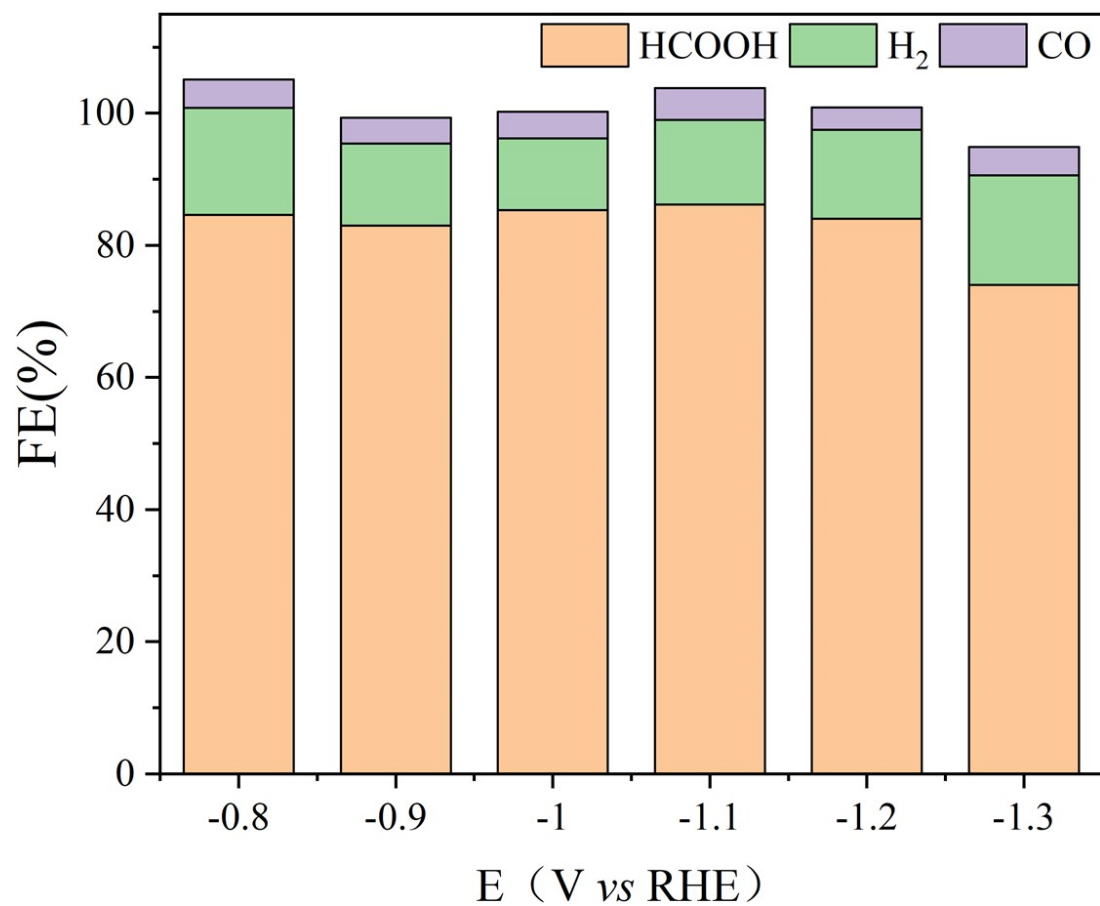

**Fig. S22.** FE for HCOOH, H<sub>2</sub>, CO at different potentials on Bi<sub>3</sub>In<sub>7</sub> NF.

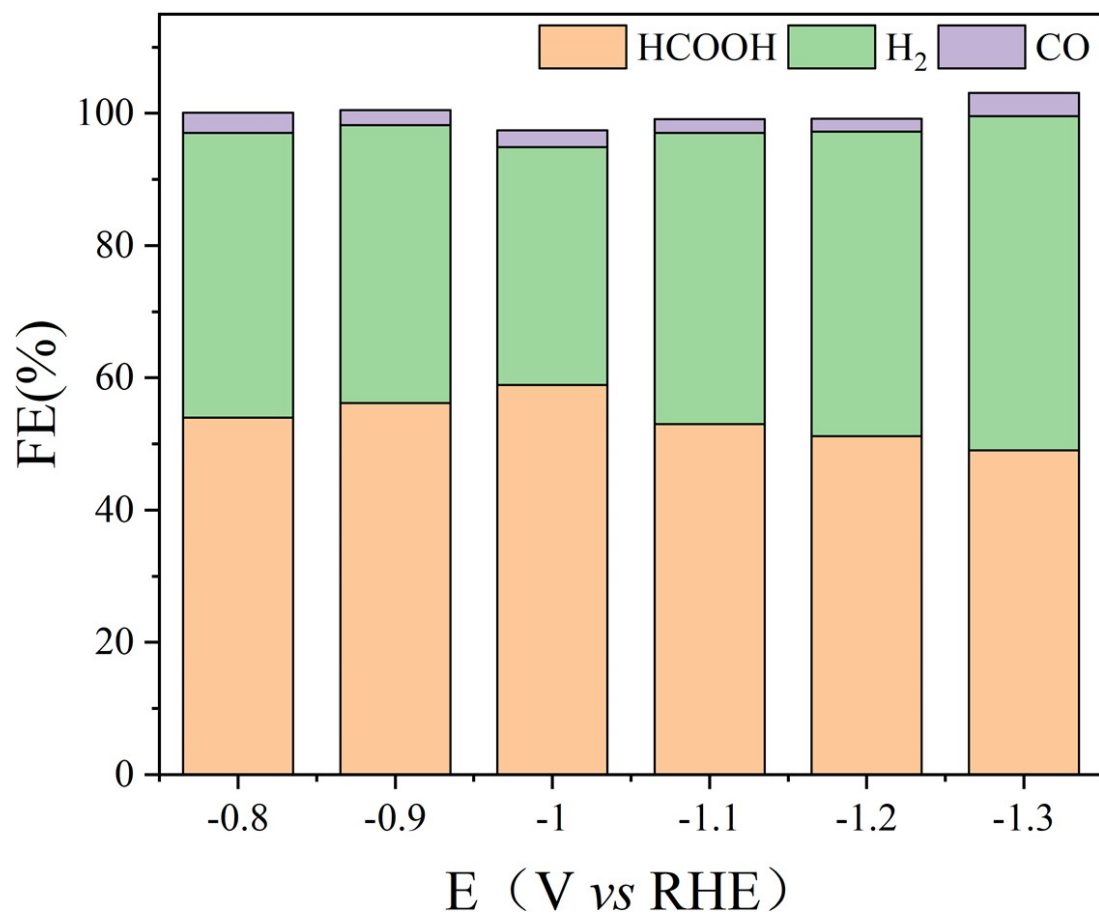

**Fig. S23.** FE for HCOOH, H<sub>2</sub>, CO at different potentials on In NF.

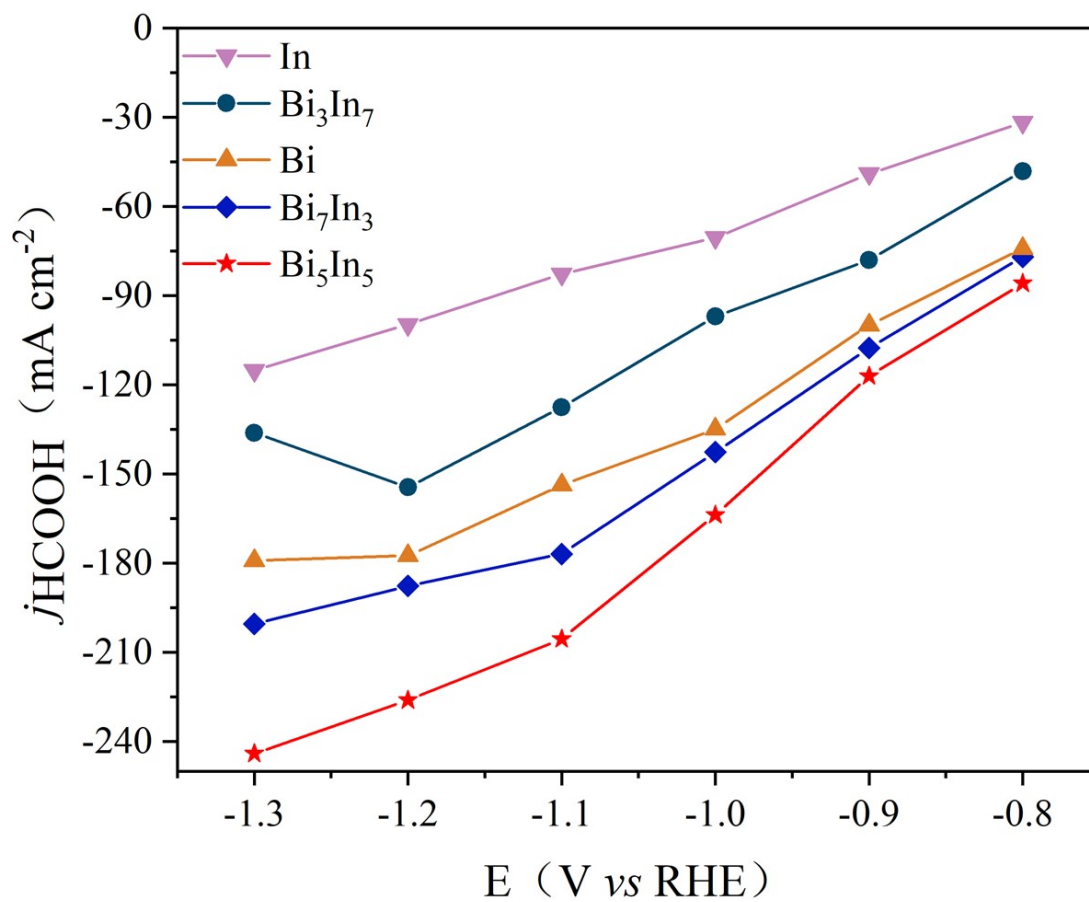

**Fig. S24.** Partial current densities of HCOOH on Bi<sub>x</sub>In<sub>y</sub> NFs.



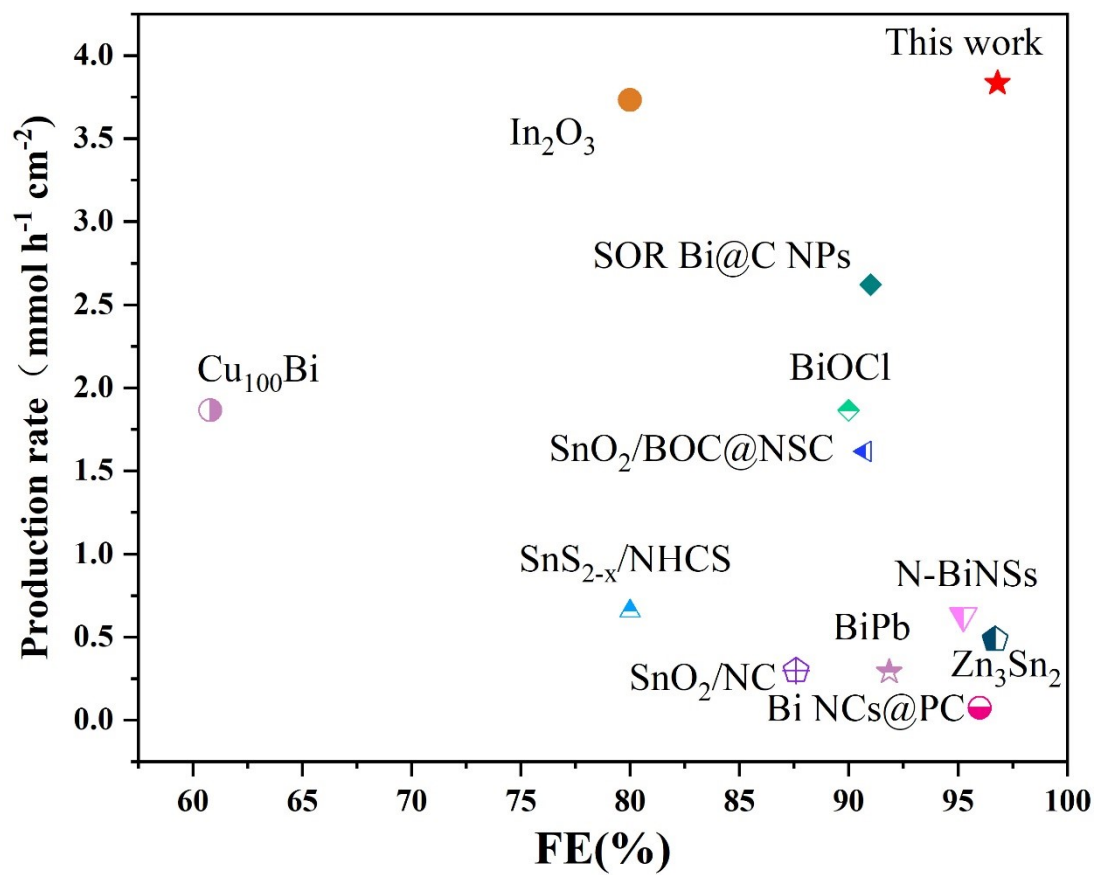

Fig. S25. Catalytic performance comparison with the recently reported catalysts.

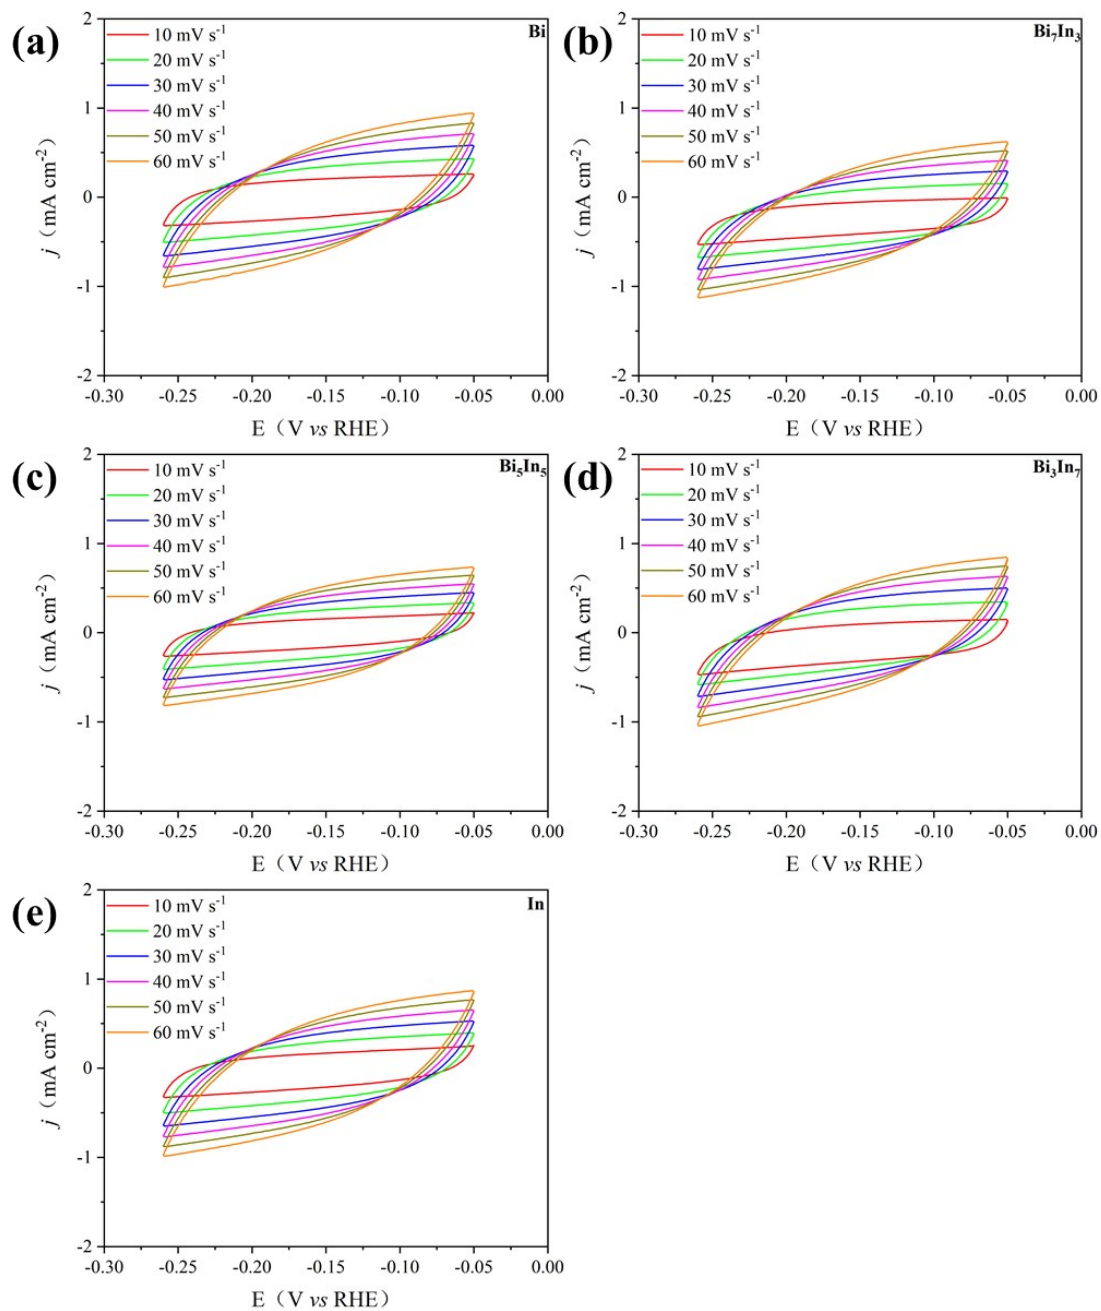

**Fig. S26.** CV curves of the (a) Bi NFs, (b)  $\text{Bi}_7\text{In}_3$  NFs, (c)  $\text{Bi}_5\text{In}_5$  NPs, (d)  $\text{Bi}_3\text{In}_7$  NPs, and (e) In NFs.

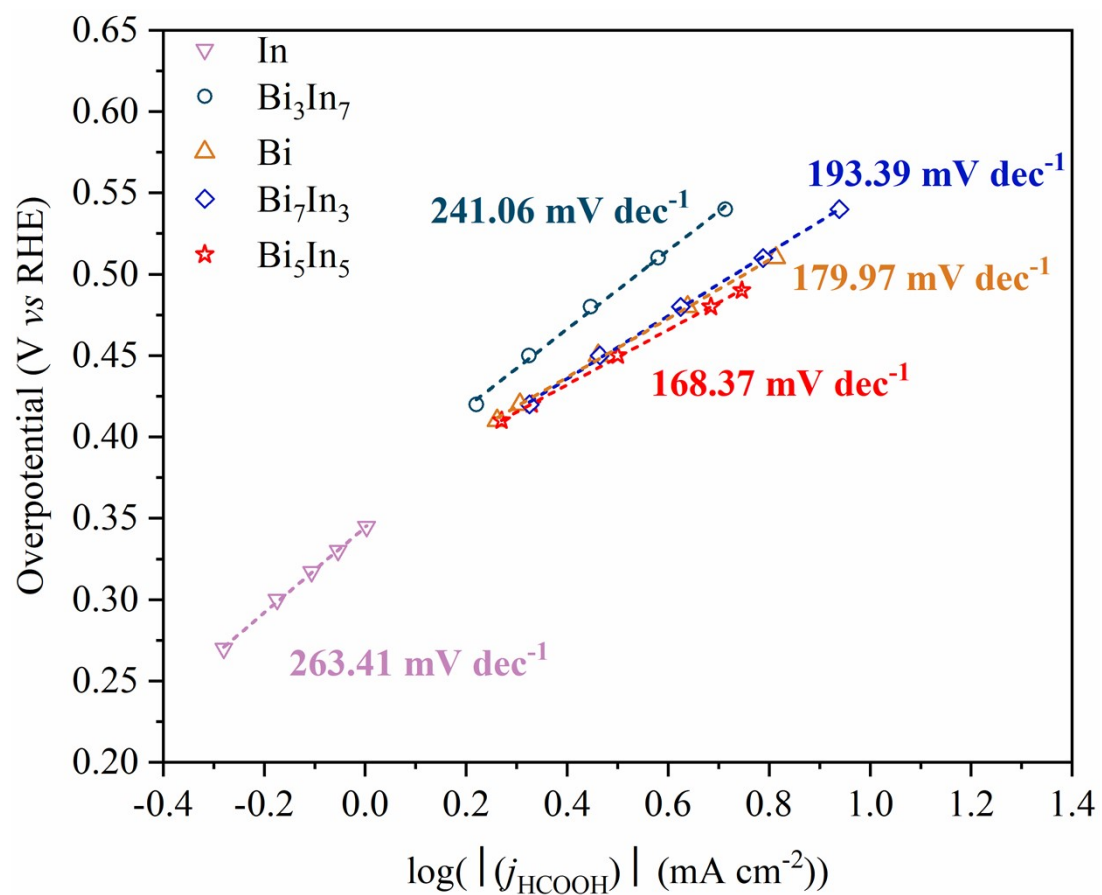

**Fig. S27.** The Tafel slopes of different catalysts.

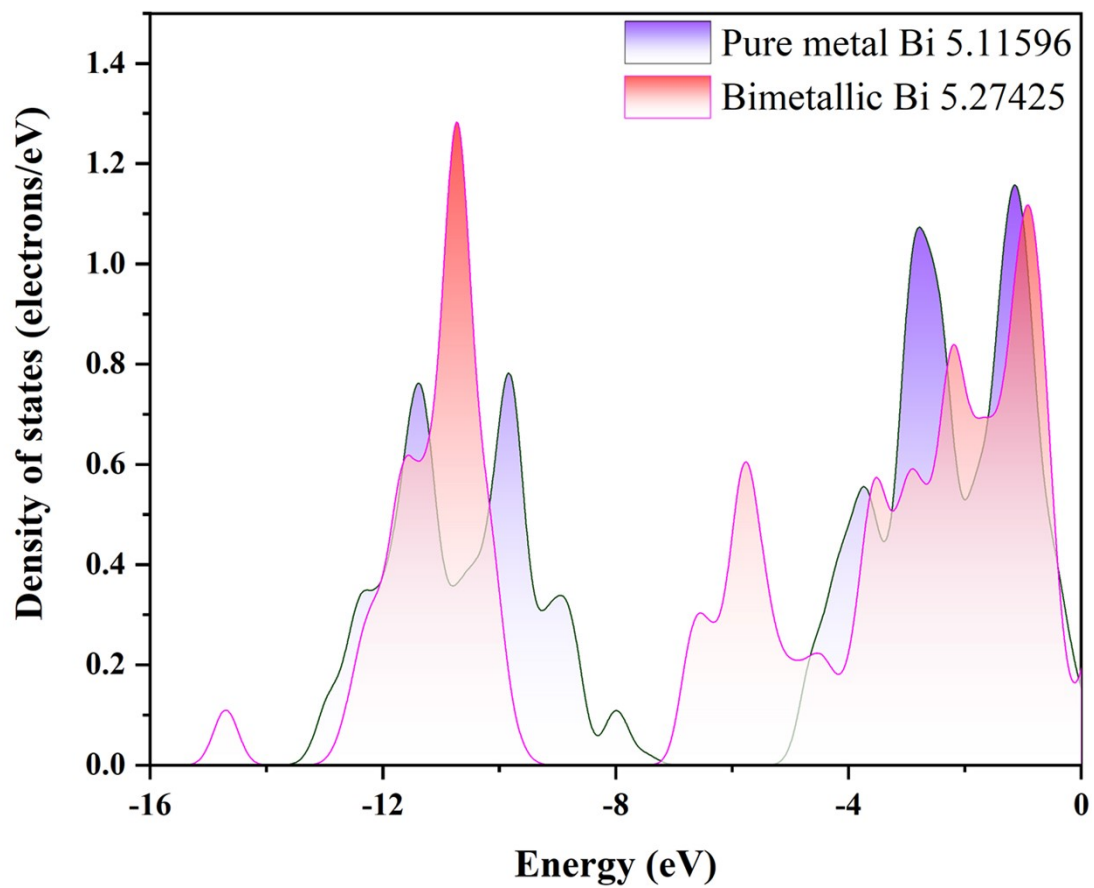

Fig. S28. Density of states for Bi atoms in InBi.

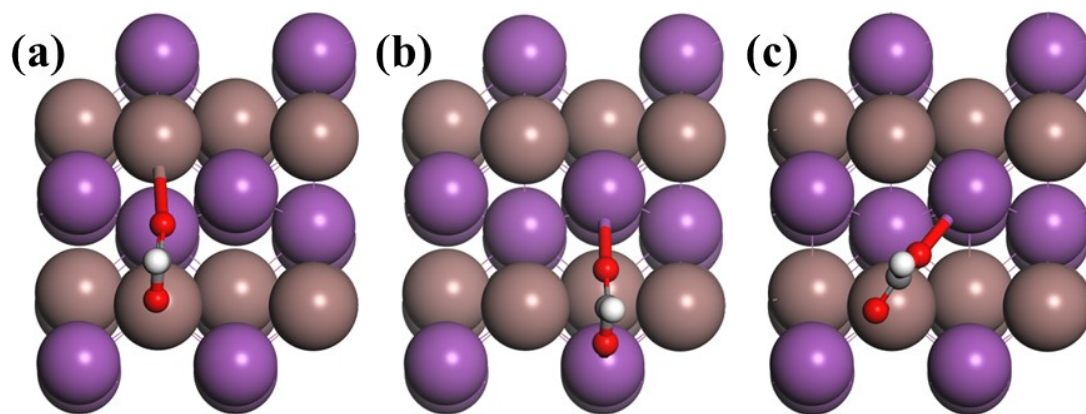

**Fig. S29.** \*OCHO intermediate adsorption sites of (a) In-In, (b) Bi-Bi, (c) In-Bi.

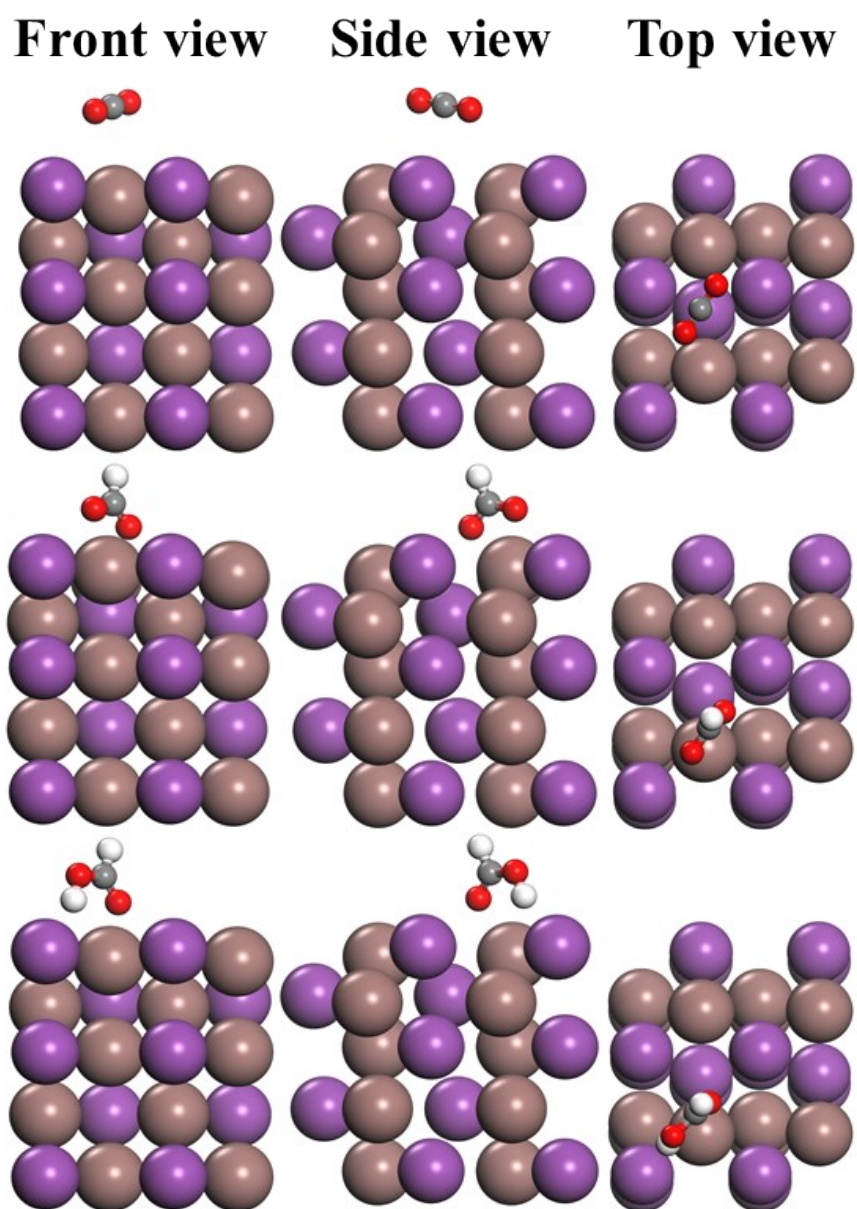

**Fig. S30.** Three-view Picture of DFT configurations for CO<sub>2</sub>\*, \*OCHO, and \*HCOOH on the InBi (200) surface.

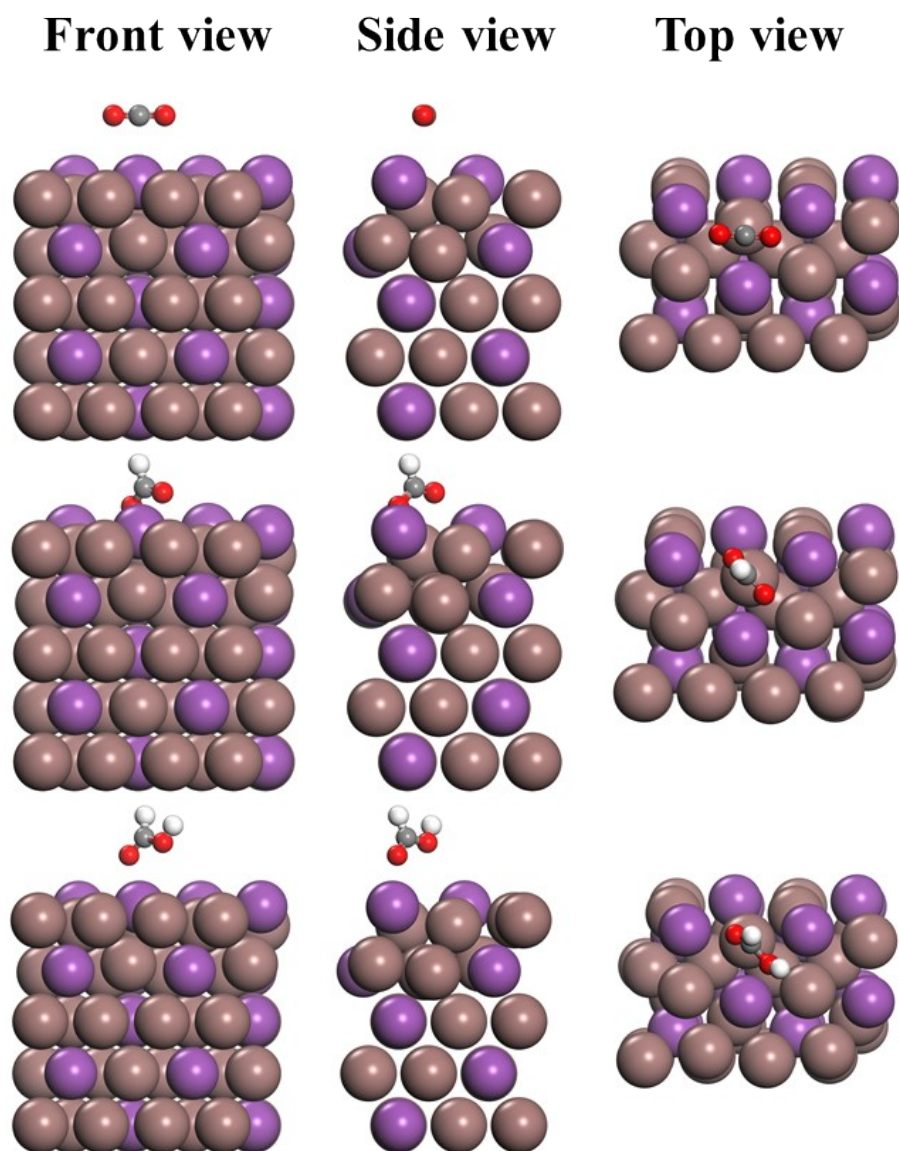

**Fig. S31.** Three-view Picture of DFT configurations for  $\text{CO}_2^*$ ,  $^*\text{OCHO}$ , and  $^*\text{HCOOH}$  on the  $\text{BiIn}_2$  (110) surface.

**Front view**      **Side view**      **Top view**

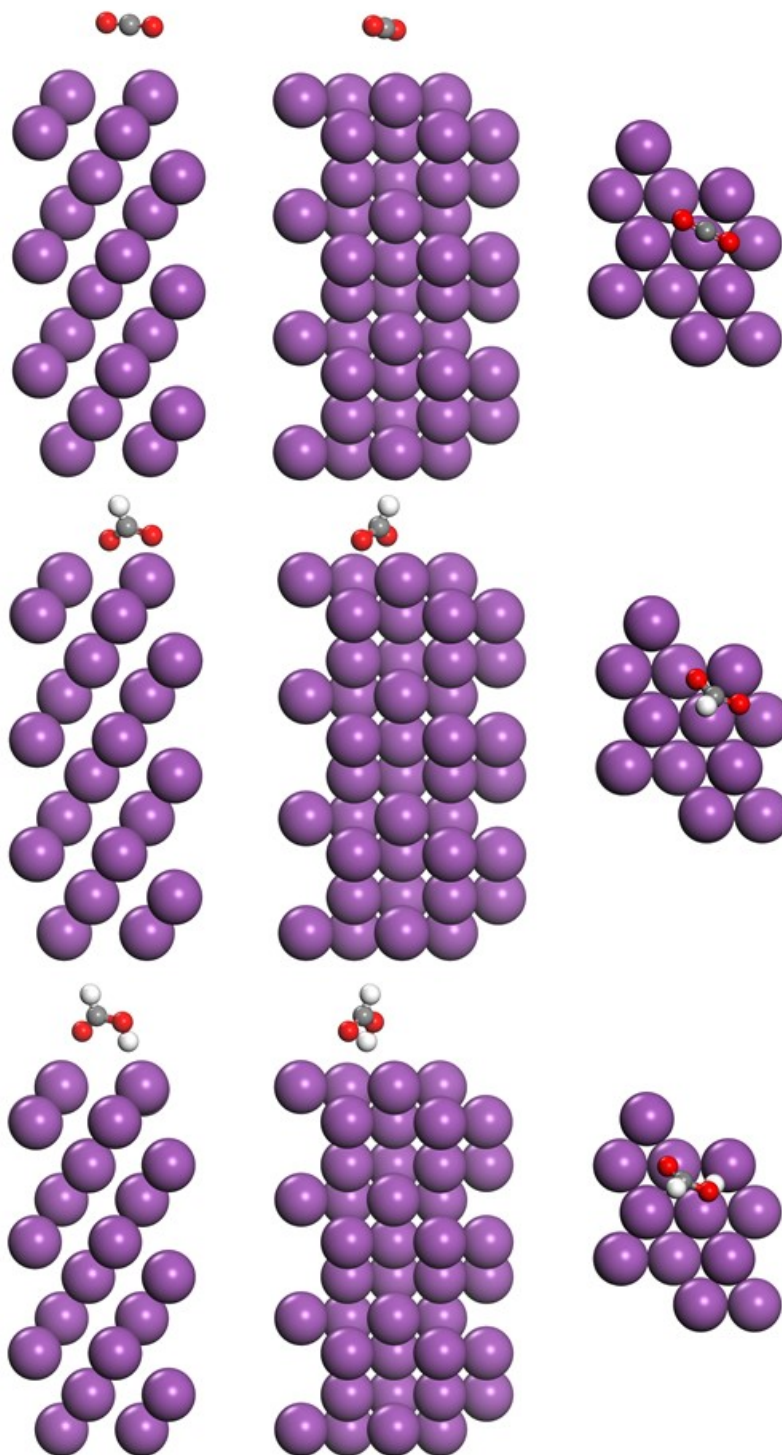

**Fig. S32.** Three-view Picture of DFT configurations for  $\text{CO}_2^*$ ,  $^*\text{OCHO}$ , and  $^*\text{HCOOH}$  on the Bi (003) surface.



**Front view**

**Side view**

**Top view**

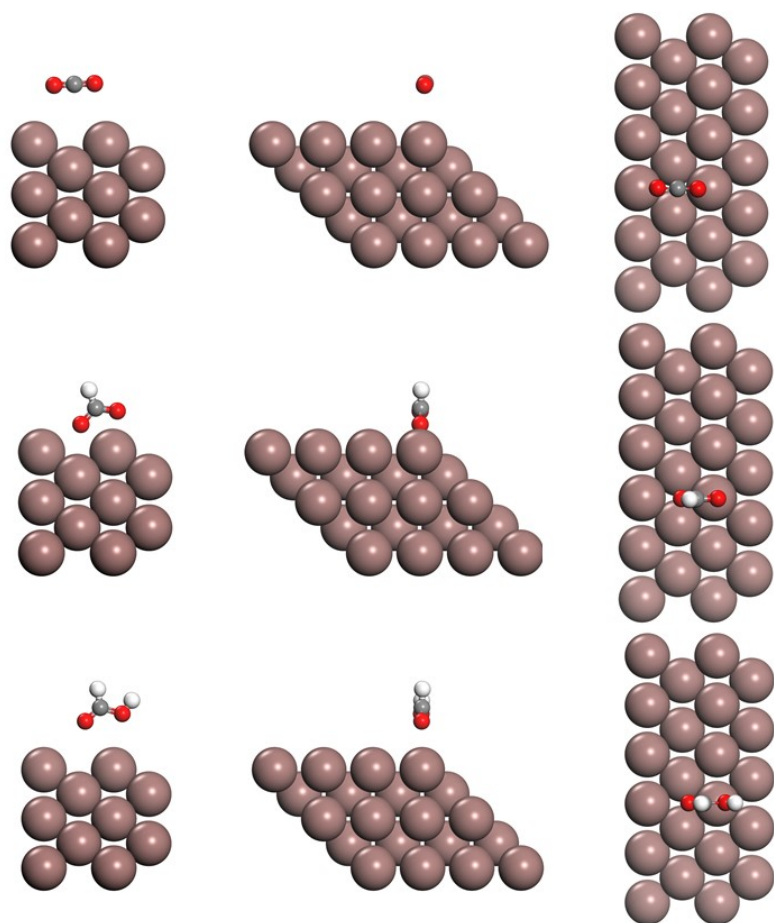

**Fig. S33.** Three-view Picture of DFT configurations for CO<sub>2</sub>\*, \*OCHO, and \*HCOOH on the In (112) surface.

**Table S1.** EDS elemental analysis of  $\text{In}_x\text{Bi}_y$  NFs.

| Code                     | Atomic % (at%) |       |
|--------------------------|----------------|-------|
|                          | Bi             | In    |
| Bi                       | 100            | 0     |
| $\text{Bi}_7\text{In}_3$ | 67.38          | 32.62 |
| $\text{Bi}_5\text{In}_5$ | 51.45          | 48.55 |
| $\text{Bi}_3\text{In}_7$ | 31.56          | 68.44 |
| In                       | 100            | 0     |

**Table S2.** ICP analysis of  $\text{In}_x\text{Bi}_y$  NFs.

| Code                     | Atomic % (at%) |       |
|--------------------------|----------------|-------|
|                          | Bi             | In    |
| $\text{Bi}_7\text{In}_3$ | 70.59          | 29.41 |
| $\text{Bi}_5\text{In}_5$ | 50.98          | 49.02 |
| $\text{Bi}_3\text{In}_7$ | 31.37          | 68.63 |

**Table S3.** The enthalpy of In-In, Bi-Bi, and In-Bi adsorption sites with \*OCHO intermediate.

|                     | In-In        | Bi-Bi        | In-Bi        |
|---------------------|--------------|--------------|--------------|
| Final enthalpy (eV) | -44004.24994 | -44004.22351 | -44004.30767 |

**Table S4.** Calculated Gibbs free energy results of the intermediates on Bi, In, BiIn<sub>2</sub>, InBi

| Free energy (eV)  | *CO <sub>2</sub> | *OCHO        | *HCOOH       | HCOOH        |
|-------------------|------------------|--------------|--------------|--------------|
| Bi                | -16899.39653     | -16914.99642 | -16931.08746 | -1069.496642 |
| In                | -71253.59698     | -71269.74023 | -71285.39774 | -1069.496642 |
| BiIn <sub>2</sub> | -79179.30407     | -79195.26181 | -79211.07316 | -1069.496642 |
| InBi              | -44060.45862     | -44076.43317 | -44092.26833 | -1069.496642 |
